# Supplementary material for: A Multimodal Omics Exploration of the Motor and Non-Motor Symptoms of Parkinson’s Disease
Source: MDPI journal article supplement (doi:10.3390/ijtm2010009), 2022-03-08
Supplement: s1 [file s1]

**Supplemental Table S1.** Baseline demographic and clinical characteristics of the 48 PD patients included in the study.

Unless otherwise specified, quantitative variables are presented as mean  $\pm$  standard deviation (n, range) and categorical variables as count (percentage). Abbreviation: UPDRS, Parkinson's Disease Rating Scale.

|                                                                            |                                         |                       |
|----------------------------------------------------------------------------|-----------------------------------------|-----------------------|
| PD patients, n                                                             | 48                                      | Category of variables |
| Gender, men/women (%men)                                                   | 34/14 (70.8%)                           | Demographic           |
| Age (years)                                                                | 61.5 $\pm$ 7.9 (n=48, r=45.6-81.1)      |                       |
| Height (m)                                                                 | 170.4 $\pm$ 8.4 (n=48, r=152-190)       |                       |
| Weight (kg)                                                                | 73.8 $\pm$ 10.3 (n=48, r=52-106)        |                       |
| Body mass index                                                            | 25.3 $\pm$ 3.2 (n=48, r=18.9-33.4)      |                       |
| Age at onset (years)                                                       | 52.3 $\pm$ 9.4 (n=48, r=25-73)          |                       |
| PD duration since diagnosis (years)                                        | 8.9 $\pm$ 3.6 (n=48, r=2-23)            | Disease               |
| UPDRS part III – OFF                                                       | 29.6 $\pm$ 10 (n=47, r=8-50)            |                       |
| UPDRS part III – ON                                                        | 15.7 $\pm$ 8.9 (n=48, r=2-39)           |                       |
| Hoehn and Yahr staging [range 1-5], median (n, interquartile range, range) | 2 (n=47, iqr=2-2.5, r=1.3)              |                       |
| Stages 1-1.5, n (%)                                                        | 11 (23.4%)                              |                       |
| Stages 2-2.5, n (%)                                                        | 31 (66.0%)                              |                       |
| Stage 3, n (%)                                                             | 5 (10.6%)                               |                       |
| Levodopa equivalent daily dose (mg)                                        | 256.5 $\pm$ 61.1 (n=46, r=150-400)      | Sleep                 |
| Epworth Sleeping Scale [range 0-24]                                        | 8.5 $\pm$ 5.2 (n=48, r=1-19)            |                       |
| Mini-Mental State Examination (/30)                                        | 27.9 $\pm$ 1.7 (n=48, r=22-30)          | Cognition             |
| Mattis Dementia Rating Scale (/144)                                        | 136.8 $\pm$ 4.7 (n=48, r=126-144)       |                       |
| Stroop Interference Test                                                   | 35 $\pm$ 10 (n=48, r=17-72)             |                       |
| Trail Making Test B-A (s)                                                  | 57.2 $\pm$ 35.7 (n=47, r=7-145)         |                       |
| Free and cued Memory Recall Test (/48)                                     | 28.1 $\pm$ 6.8 (n=48, r=14-41)          |                       |
| Score axial on                                                             | 4.6 $\pm$ 3.9 (n=48, r=0-16)            | Motor                 |
| Anticipatory Postural Adjustments (APAx)                                   | 0.037 $\pm$ 0.013 (n=47, r=0.02-0.08)   |                       |
| Anticipatory Postural Adjustments (APAy)                                   | 0.048 $\pm$ 0.016 (n=47, r=0.019-0.086) |                       |
| Score appendicular – ON                                                    | 12.4 $\pm$ 7.2 (n=48, r=2-34)           |                       |
| Score axial – ON                                                           | 3.3 $\pm$ 2.5 (n=48, r=0-10)            |                       |
| Montgomery and Åsberg Depression Rating Scale (/60)                        | 8.8 $\pm$ 5.5 (n=48, r=0-22)            | Emotion               |
| Brief Anxiety Scale (/60)                                                  | 6.9 $\pm$ 3.9 (n=48, r=0-14)            |                       |
| Starkstein Apathy Scale (/42)                                              | 8.8 $\pm$ 4.7 (n=48, r=0-21)            |                       |
