# Supplementary material for: A Multimodal Omics Exploration of the Motor and Non-Motor Symptoms of Parkinson’s Disease
Source: MDPI journal article supplement (doi:10.3390/ijtm2010009), 2022-03-08
Supplement: s1 [file s1]

Archive with 5 entries (5 files):
- Nucleipark_Figure S1_20220221.tiff
- Nucleipark_Figure S2_20220221.tif
- Nucleipark_SuppInformation_File S1_20211217.pdf
- Nucleipark_SuppInformation_Table S1_20220218.pdf
- Nucleipark_SuppInformation_Table S2_20220218.xls
