# Supplementary material for: A Multimodal Omics Exploration of the Motor and Non-Motor Symptoms of Parkinson’s Disease
Source: MDPI journal article supplement (doi:10.3390/ijtm2010009), 2022-03-08
Supplement: s1 [file s1 › Nucleipark_SuppInformation_Table S2_20220218.xls]

## Sheet: NP_ClinModels_GeneList
GENE		SELECTED IN MODEL (TRUE/FALSE)
Gene_symbol	Gene_description	MOTOR	COGNITION	EMOTION
ABCC6	ATP binding cassette subfamily C member 6 [Source:HGNC Symbol;Acc:HGNC:57]	FALSE	TRUE	FALSE
ABCD4	ATP binding cassette subfamily D member 4 [Source:HGNC Symbol;Acc:HGNC:68]	TRUE	FALSE	FALSE
ABHD14A	abhydrolase domain containing 14A [Source:HGNC Symbol;Acc:HGNC:24538]	TRUE	FALSE	FALSE
ABHD6	abhydrolase domain containing 6, acylglycerol lipase [Source:HGNC Symbol;Acc:HGNC:21398]	FALSE	TRUE	FALSE
ABRAXAS1	abraxas 1, BRCA1 A complex subunit [Source:HGNC Symbol;Acc:HGNC:25829]	TRUE	FALSE	FALSE
ADAR	adenosine deaminase RNA specific [Source:HGNC Symbol;Acc:HGNC:225]	TRUE	FALSE	FALSE
AEBP1	AE binding protein 1 [Source:HGNC Symbol;Acc:HGNC:303]	TRUE	FALSE	FALSE
AEN	apoptosis enhancing nuclease [Source:HGNC Symbol;Acc:HGNC:25722]	FALSE	TRUE	FALSE
AFF3	AF4/FMR2 family member 3 [Source:HGNC Symbol;Acc:HGNC:6473]	FALSE	TRUE	FALSE
AGER	advanced glycosylation end-product specific receptor [Source:HGNC Symbol;Acc:HGNC:320]	TRUE	FALSE	FALSE
AHI1	Abelson helper integration site 1 [Source:HGNC Symbol;Acc:HGNC:21575]	FALSE	FALSE	TRUE
AMDHD1	amidohydrolase domain containing 1 [Source:HGNC Symbol;Acc:HGNC:28577]	FALSE	TRUE	FALSE
AMN1	antagonist of mitotic exit network 1 homolog [Source:HGNC Symbol;Acc:HGNC:27281]	FALSE	FALSE	TRUE
ANKMY1	ankyrin repeat and MYND domain containing 1 [Source:HGNC Symbol;Acc:HGNC:20987]	FALSE	FALSE	TRUE
ANKRD22	ankyrin repeat domain 22 [Source:HGNC Symbol;Acc:HGNC:28321]	TRUE	FALSE	FALSE
ANKRD27	ankyrin repeat domain 27 [Source:HGNC Symbol;Acc:HGNC:25310]	FALSE	FALSE	TRUE
ANKRD54	ankyrin repeat domain 54 [Source:HGNC Symbol;Acc:HGNC:25185]	FALSE	TRUE	FALSE
ANXA6	annexin A6 [Source:HGNC Symbol;Acc:HGNC:544]	TRUE	FALSE	FALSE
APBA2	amyloid beta precursor protein binding family A member 2 [Source:HGNC Symbol;Acc:HGNC:579]	FALSE	TRUE	FALSE
APIP	APAF1 interacting protein [Source:HGNC Symbol;Acc:HGNC:17581]	FALSE	TRUE	FALSE
APOL2	apolipoprotein L2 [Source:HGNC Symbol;Acc:HGNC:619]	FALSE	TRUE	FALSE
APOL6	apolipoprotein L6 [Source:HGNC Symbol;Acc:HGNC:14870]	TRUE	FALSE	FALSE
APOOL	apolipoprotein O like [Source:HGNC Symbol;Acc:HGNC:24009]	FALSE	FALSE	TRUE
AQR	aquarius intron-binding spliceosomal factor [Source:HGNC Symbol;Acc:HGNC:29513]	FALSE	FALSE	TRUE
ARPIN	actin related protein 2/3 complex inhibitor [Source:HGNC Symbol;Acc:HGNC:28782]	TRUE	FALSE	FALSE
AS3MT	arsenite methyltransferase [Source:HGNC Symbol;Acc:HGNC:17452]	TRUE	FALSE	FALSE
ASB2	ankyrin repeat and SOCS box containing 2 [Source:HGNC Symbol;Acc:HGNC:16012]	FALSE	FALSE	TRUE
ASL	argininosuccinate lyase [Source:HGNC Symbol;Acc:HGNC:746]	TRUE	FALSE	FALSE
ATOX1	antioxidant 1 copper chaperone [Source:HGNC Symbol;Acc:HGNC:798]	FALSE	FALSE	TRUE
ATP10D	ATPase phospholipid transporting 10D (putative) [Source:HGNC Symbol;Acc:HGNC:13549]	FALSE	TRUE	FALSE
ATP6V0B	ATPase H+ transporting V0 subunit b [Source:HGNC Symbol;Acc:HGNC:861]	FALSE	FALSE	TRUE
ATP6V1FNB	ATP6V1F neighbor [Source:HGNC Symbol;Acc:HGNC:52392]	FALSE	FALSE	TRUE
ATRAID	all-trans retinoic acid induced differentiation factor [Source:HGNC Symbol;Acc:HGNC:24090]	FALSE	FALSE	TRUE
ATXN3	ataxin 3 [Source:HGNC Symbol;Acc:HGNC:7106]	FALSE	FALSE	TRUE
B3GALNT2	beta-1,3-N-acetylgalactosaminyltransferase 2 [Source:HGNC Symbol;Acc:HGNC:28596]	FALSE	FALSE	TRUE
B4GALT4	beta-1,4-galactosyltransferase 4 [Source:HGNC Symbol;Acc:HGNC:927]	FALSE	TRUE	FALSE
BANP	BTG3 associated nuclear protein [Source:HGNC Symbol;Acc:HGNC:13450]	TRUE	FALSE	FALSE
BCKDHA	branched chain keto acid dehydrogenase E1 subunit alpha [Source:HGNC Symbol;Acc:HGNC:986]	FALSE	FALSE	TRUE
BCKDK	branched chain keto acid dehydrogenase kinase [Source:HGNC Symbol;Acc:HGNC:16902]	FALSE	FALSE	TRUE
BCL9L	BCL9 like [Source:HGNC Symbol;Acc:HGNC:23688]	FALSE	FALSE	TRUE
BCO2	beta-carotene oxygenase 2 [Source:HGNC Symbol;Acc:HGNC:18503]	TRUE	FALSE	FALSE
BIRC6	baculoviral IAP repeat containing 6 [Source:HGNC Symbol;Acc:HGNC:13516]	FALSE	FALSE	TRUE
BLM	BLM RecQ like helicase [Source:HGNC Symbol;Acc:HGNC:1058]	FALSE	FALSE	TRUE
BLVRA	biliverdin reductase A [Source:HGNC Symbol;Acc:HGNC:1062]	TRUE	FALSE	FALSE
BMP2K	BMP2 inducible kinase [Source:HGNC Symbol;Acc:HGNC:18041]	TRUE	FALSE	FALSE
BTN2A1	butyrophilin subfamily 2 member A1 [Source:HGNC Symbol;Acc:HGNC:1136]	TRUE	FALSE	FALSE
BTN3A3	butyrophilin subfamily 3 member A3 [Source:HGNC Symbol;Acc:HGNC:1140]	FALSE	TRUE	FALSE
C12orf49	chromosome 12 open reading frame 49 [Source:HGNC Symbol;Acc:HGNC:26128]	TRUE	FALSE	FALSE
C16orf86	chromosome 16 open reading frame 86 [Source:HGNC Symbol;Acc:HGNC:33755]	FALSE	TRUE	FALSE
C17orf100	chromosome 17 open reading frame 100 [Source:HGNC Symbol;Acc:HGNC:34494]	FALSE	TRUE	FALSE
C1orf127	chromosome 1 open reading frame 127 [Source:HGNC Symbol;Acc:HGNC:26730]	FALSE	FALSE	TRUE
CA11	carbonic anhydrase 11 [Source:HGNC Symbol;Acc:HGNC:1370]	FALSE	FALSE	TRUE
CABLES1	Cdk5 and Abl enzyme substrate 1 [Source:HGNC Symbol;Acc:HGNC:25097]	FALSE	TRUE	FALSE
CACNB3	calcium voltage-gated channel auxiliary subunit beta 3 [Source:HGNC Symbol;Acc:HGNC:1403]	FALSE	TRUE	FALSE
CARD17	caspase recruitment domain family member 17 [Source:HGNC Symbol;Acc:HGNC:33827]	FALSE	FALSE	TRUE
CASP5	caspase 5 [Source:HGNC Symbol;Acc:HGNC:1506]	TRUE	FALSE	FALSE
CATSPER2	cation channel sperm associated 2 [Source:HGNC Symbol;Acc:HGNC:18810]	TRUE	FALSE	FALSE
CBWD1	COBW domain containing 1 [Source:HGNC Symbol;Acc:HGNC:17134]	FALSE	TRUE	FALSE
CCAR1	cell division cycle and apoptosis regulator 1 [Source:HGNC Symbol;Acc:HGNC:24236]	TRUE	FALSE	FALSE
CCDC142	coiled-coil domain containing 142 [Source:HGNC Symbol;Acc:HGNC:25889]	FALSE	TRUE	FALSE
CCDC151	coiled-coil domain containing 151 [Source:HGNC Symbol;Acc:HGNC:28303]	FALSE	FALSE	TRUE
CCDC175	coiled-coil domain containing 175 [Source:HGNC Symbol;Acc:HGNC:19847]	FALSE	FALSE	TRUE
CCDC24	coiled-coil domain containing 24 [Source:HGNC Symbol;Acc:HGNC:28688]	TRUE	FALSE	FALSE
CCDC82	coiled-coil domain containing 82 [Source:HGNC Symbol;Acc:HGNC:26282]	TRUE	FALSE	FALSE
CCDC91	coiled-coil domain containing 91 [Source:HGNC Symbol;Acc:HGNC:24855]	TRUE	FALSE	FALSE
CCNJ	cyclin J [Source:HGNC Symbol;Acc:HGNC:23434]	FALSE	FALSE	TRUE
CD300A	CD300a molecule [Source:HGNC Symbol;Acc:HGNC:19319]	TRUE	FALSE	FALSE
CD300C	CD300c molecule [Source:HGNC Symbol;Acc:HGNC:19320]	FALSE	TRUE	FALSE
CDH20	cadherin 20 [Source:HGNC Symbol;Acc:HGNC:1760]	FALSE	TRUE	FALSE
CELF1	CUGBP Elav-like family member 1 [Source:HGNC Symbol;Acc:HGNC:2549]	TRUE	FALSE	FALSE
CHAMP1	chromosome alignment maintaining phosphoprotein 1 [Source:HGNC Symbol;Acc:HGNC:20311]	FALSE	TRUE	FALSE
CHRNA2	cholinergic receptor nicotinic alpha 2 subunit [Source:HGNC Symbol;Acc:HGNC:1956]	FALSE	FALSE	TRUE
COG5	component of oligomeric golgi complex 5 [Source:HGNC Symbol;Acc:HGNC:14857]	TRUE	FALSE	FALSE
COPS2	COP9 signalosome subunit 2 [Source:HGNC Symbol;Acc:HGNC:30747]	FALSE	TRUE	FALSE
CPNE4	copine 4 [Source:HGNC Symbol;Acc:HGNC:2317]	FALSE	TRUE	FALSE
CRIP3	cysteine rich protein 3 [Source:HGNC Symbol;Acc:HGNC:17751]	FALSE	TRUE	FALSE
CTBP1	C-terminal binding protein 1 [Source:HGNC Symbol;Acc:HGNC:2494]	TRUE	FALSE	FALSE
CTCF	CCCTC-binding factor [Source:HGNC Symbol;Acc:HGNC:13723]	FALSE	TRUE	FALSE
CXorf38	chromosome X open reading frame 38 [Source:HGNC Symbol;Acc:HGNC:28589]	FALSE	TRUE	FALSE
CYB561	cytochrome b561 [Source:HGNC Symbol;Acc:HGNC:2571]	TRUE	FALSE	FALSE
CYSTM1	cysteine rich transmembrane module containing 1 [Source:HGNC Symbol;Acc:HGNC:30239]	FALSE	FALSE	TRUE
DCXR	dicarbonyl and L-xylulose reductase [Source:HGNC Symbol;Acc:HGNC:18985]	FALSE	FALSE	TRUE
DDIAS	DNA damage induced apoptosis suppressor [Source:HGNC Symbol;Acc:HGNC:26351]	FALSE	FALSE	TRUE
DENND1C	DENN domain containing 1C [Source:HGNC Symbol;Acc:HGNC:26225]	TRUE	FALSE	FALSE
DFFB	DNA fragmentation factor subunit beta [Source:HGNC Symbol;Acc:HGNC:2773]	TRUE	FALSE	FALSE
DHCR7	7-dehydrocholesterol reductase [Source:HGNC Symbol;Acc:HGNC:2860]	TRUE	FALSE	TRUE
DHRS4L2	dehydrogenase/reductase 4 like 2 [Source:HGNC Symbol;Acc:HGNC:19731]	FALSE	FALSE	TRUE
DHX16	DEAH-box helicase 16 [Source:HGNC Symbol;Acc:HGNC:2739]	TRUE	FALSE	FALSE
DHX58	DExH-box helicase 58 [Source:HGNC Symbol;Acc:HGNC:29517]	TRUE	FALSE	FALSE
DISC1	DISC1 scaffold protein [Source:HGNC Symbol;Acc:HGNC:2888]	FALSE	TRUE	FALSE
DMAC1	distal membrane arm assembly complex 1 [Source:HGNC Symbol;Acc:HGNC:30536]	FALSE	FALSE	TRUE
DNAAF2	dynein axonemal assembly factor 2 [Source:HGNC Symbol;Acc:HGNC:20188]	FALSE	TRUE	FALSE
DNASE1L3	deoxyribonuclease 1 like 3 [Source:HGNC Symbol;Acc:HGNC:2959]	FALSE	TRUE	FALSE
DOCK11	dedicator of cytokinesis 11 [Source:HGNC Symbol;Acc:HGNC:23483]	FALSE	TRUE	FALSE
DUSP12	dual specificity phosphatase 12 [Source:HGNC Symbol;Acc:HGNC:3067]	FALSE	FALSE	TRUE
EEF1AKMT1	EEF1A lysine methyltransferase 1 [Source:HGNC Symbol;Acc:HGNC:27351]	FALSE	FALSE	TRUE
EIF1AY	eukaryotic translation initiation factor 1A Y-linked [Source:HGNC Symbol;Acc:HGNC:3252]	FALSE	FALSE	TRUE
EIF3K	eukaryotic translation initiation factor 3 subunit K [Source:HGNC Symbol;Acc:HGNC:24656]	FALSE	FALSE	TRUE
ELOA	elongin A [Source:HGNC Symbol;Acc:HGNC:11620]	TRUE	FALSE	FALSE
ELP6	elongator acetyltransferase complex subunit 6 [Source:HGNC Symbol;Acc:HGNC:25976]	FALSE	FALSE	TRUE
EMC3	ER membrane protein complex subunit 3 [Source:HGNC Symbol;Acc:HGNC:23999]	FALSE	FALSE	TRUE
EMC9	ER membrane protein complex subunit 9 [Source:HGNC Symbol;Acc:HGNC:20273]	TRUE	FALSE	FALSE
ENO4	enolase 4 [Source:HGNC Symbol;Acc:HGNC:31670]	TRUE	FALSE	FALSE
ENTR1	endosome associated trafficking regulator 1 [Source:HGNC Symbol;Acc:HGNC:10667]	TRUE	FALSE	FALSE
EP300	E1A binding protein p300 [Source:HGNC Symbol;Acc:HGNC:3373]	FALSE	FALSE	TRUE
EPS8L1	EPS8 like 1 [Source:HGNC Symbol;Acc:HGNC:21295]	FALSE	TRUE	FALSE
ERCC5	ERCC excision repair 5, endonuclease [Source:HGNC Symbol;Acc:HGNC:3437]	TRUE	FALSE	FALSE
ERCC6L2	ERCC excision repair 6 like 2 [Source:HGNC Symbol;Acc:HGNC:26922]	FALSE	TRUE	FALSE
ERO1A	endoplasmic reticulum oxidoreductase 1 alpha [Source:HGNC Symbol;Acc:HGNC:13280]	FALSE	FALSE	TRUE
ETFB	electron transfer flavoprotein subunit beta [Source:HGNC Symbol;Acc:HGNC:3482]	FALSE	FALSE	TRUE
ETFRF1	electron transfer flavoprotein regulatory factor 1 [Source:HGNC Symbol;Acc:HGNC:27052]	TRUE	FALSE	FALSE
ETV7	ETS variant transcription factor 7 [Source:HGNC Symbol;Acc:HGNC:18160]	TRUE	FALSE	FALSE
EXOSC10	exosome component 10 [Source:HGNC Symbol;Acc:HGNC:9138]	TRUE	FALSE	FALSE
F8	coagulation factor VIII [Source:HGNC Symbol;Acc:HGNC:3546]	FALSE	TRUE	FALSE
FAM117A	family with sequence similarity 117 member A [Source:HGNC Symbol;Acc:HGNC:24179]	FALSE	TRUE	FALSE
FAM160A2	family with sequence similarity 160 member A2 [Source:HGNC Symbol;Acc:HGNC:25378]	TRUE	FALSE	FALSE
FAM160B1	family with sequence similarity 160 member B1 [Source:HGNC Symbol;Acc:HGNC:29320]	FALSE	TRUE	FALSE
FAM216A	family with sequence similarity 216 member A [Source:HGNC Symbol;Acc:HGNC:30180]	FALSE	FALSE	TRUE
FAM220A	family with sequence similarity 220 member A [Source:HGNC Symbol;Acc:HGNC:22422]	FALSE	TRUE	FALSE
FAM3B	FAM3 metabolism regulating signaling molecule B [Source:HGNC Symbol;Acc:HGNC:1253]	FALSE	TRUE	FALSE
FAM72B	family with sequence similarity 72 member B [Source:HGNC Symbol;Acc:HGNC:24805]	FALSE	TRUE	FALSE
FAM98A	family with sequence similarity 98 member A [Source:HGNC Symbol;Acc:HGNC:24520]	TRUE	FALSE	FALSE
FAR2	fatty acyl-CoA reductase 2 [Source:HGNC Symbol;Acc:HGNC:25531]	FALSE	FALSE	TRUE
FBP1	fructose-bisphosphatase 1 [Source:HGNC Symbol;Acc:HGNC:3606]	FALSE	FALSE	TRUE
FDX2	ferredoxin 2 [Source:HGNC Symbol;Acc:HGNC:30546]	TRUE	FALSE	FALSE
FRYL	FRY like transcription coactivator [Source:HGNC Symbol;Acc:HGNC:29127]	FALSE	FALSE	TRUE
FUNDC1	FUN14 domain containing 1 [Source:HGNC Symbol;Acc:HGNC:28746]	FALSE	TRUE	FALSE
FUOM	fucose mutarotase [Source:HGNC Symbol;Acc:HGNC:24733]	FALSE	FALSE	TRUE
GABARAP	GABA type A receptor-associated protein [Source:HGNC Symbol;Acc:HGNC:4067]	FALSE	FALSE	TRUE
GBP1	guanylate binding protein 1 [Source:HGNC Symbol;Acc:HGNC:4182]	TRUE	FALSE	FALSE
GBP2	guanylate binding protein 2 [Source:HGNC Symbol;Acc:HGNC:4183]	TRUE	FALSE	FALSE
GBP5	guanylate binding protein 5 [Source:HGNC Symbol;Acc:HGNC:19895]	TRUE	FALSE	FALSE
GEMIN8	gem nuclear organelle associated protein 8 [Source:HGNC Symbol;Acc:HGNC:26044]	FALSE	FALSE	TRUE
GFER	growth factor, augmenter of liver regeneration [Source:HGNC Symbol;Acc:HGNC:4236]	FALSE	FALSE	TRUE
GFOD2	glucose-fructose oxidoreductase domain containing 2 [Source:HGNC Symbol;Acc:HGNC:28159]	FALSE	TRUE	FALSE
GIPR	gastric inhibitory polypeptide receptor [Source:HGNC Symbol;Acc:HGNC:4271]	FALSE	TRUE	FALSE
GNAO1	G protein subunit alpha o1 [Source:HGNC Symbol;Acc:HGNC:4389]	TRUE	FALSE	FALSE
GNG2	G protein subunit gamma 2 [Source:HGNC Symbol;Acc:HGNC:4404]	FALSE	FALSE	TRUE
GPATCH2	G-patch domain containing 2 [Source:HGNC Symbol;Acc:HGNC:25499]	FALSE	FALSE	TRUE
GPHN	gephyrin [Source:HGNC Symbol;Acc:HGNC:15465]	FALSE	TRUE	FALSE
GPR27	G protein-coupled receptor 27 [Source:HGNC Symbol;Acc:HGNC:4482]	FALSE	TRUE	FALSE
GRIPAP1	GRIP1 associated protein 1 [Source:HGNC Symbol;Acc:HGNC:18706]	TRUE	FALSE	FALSE
GSDMB	gasdermin B [Source:HGNC Symbol;Acc:HGNC:23690]	TRUE	FALSE	FALSE
GSPT1	G1 to S phase transition 1 [Source:HGNC Symbol;Acc:HGNC:4621]	FALSE	FALSE	TRUE
GUF1	GUF1 homolog, GTPase [Source:HGNC Symbol;Acc:HGNC:25799]	FALSE	FALSE	TRUE
HAL	histidine ammonia-lyase [Source:HGNC Symbol;Acc:HGNC:4806]	FALSE	TRUE	FALSE
HBD	hemoglobin subunit delta [Source:HGNC Symbol;Acc:HGNC:4829]	FALSE	TRUE	FALSE
HBE1	hemoglobin subunit epsilon 1 [Source:HGNC Symbol;Acc:HGNC:4830]	FALSE	TRUE	FALSE
HEMK1	HemK methyltransferase family member 1 [Source:HGNC Symbol;Acc:HGNC:24923]	FALSE	FALSE	TRUE
HERPUD2	HERPUD family member 2 [Source:HGNC Symbol;Acc:HGNC:21915]	FALSE	TRUE	FALSE
HGD	homogentisate 1,2-dioxygenase [Source:HGNC Symbol;Acc:HGNC:4892]	FALSE	FALSE	TRUE
HSPA4	heat shock protein family A (Hsp70) member 4 [Source:HGNC Symbol;Acc:HGNC:5237]	FALSE	FALSE	TRUE
HSPA6	heat shock protein family A (Hsp70) member 6 [Source:HGNC Symbol;Acc:HGNC:5239]	TRUE	FALSE	FALSE
HSPD1	heat shock protein family D (Hsp60) member 1 [Source:HGNC Symbol;Acc:HGNC:5261]	TRUE	FALSE	FALSE
IBTK	inhibitor of Bruton tyrosine kinase [Source:HGNC Symbol;Acc:HGNC:17853]	FALSE	FALSE	TRUE
IFI44	interferon induced protein 44 [Source:HGNC Symbol;Acc:HGNC:16938]	TRUE	FALSE	FALSE
IL10	interleukin 10 [Source:HGNC Symbol;Acc:HGNC:5962]	FALSE	TRUE	FALSE
IMP3	IMP U3 small nucleolar ribonucleoprotein 3 [Source:HGNC Symbol;Acc:HGNC:14497]	FALSE	TRUE	FALSE
INO80C	INO80 complex subunit C [Source:HGNC Symbol;Acc:HGNC:26994]	TRUE	FALSE	FALSE
INSIG2	insulin induced gene 2 [Source:HGNC Symbol;Acc:HGNC:20452]	FALSE	FALSE	TRUE
INSL3	insulin like 3 [Source:HGNC Symbol;Acc:HGNC:6086]	TRUE	FALSE	FALSE
INTS3	integrator complex subunit 3 [Source:HGNC Symbol;Acc:HGNC:26153]	TRUE	FALSE	FALSE
INTS6	integrator complex subunit 6 [Source:HGNC Symbol;Acc:HGNC:14879]	FALSE	TRUE	FALSE
INTS8	integrator complex subunit 8 [Source:HGNC Symbol;Acc:HGNC:26048]	FALSE	FALSE	TRUE
IPP	intracisternal A particle-promoted polypeptide [Source:HGNC Symbol;Acc:HGNC:6108]	FALSE	TRUE	FALSE
IRF2BP1	interferon regulatory factor 2 binding protein 1 [Source:HGNC Symbol;Acc:HGNC:21728]	FALSE	TRUE	FALSE
IRF7	interferon regulatory factor 7 [Source:HGNC Symbol;Acc:HGNC:6122]	TRUE	FALSE	FALSE
IRF9	interferon regulatory factor 9 [Source:HGNC Symbol;Acc:HGNC:6131]	TRUE	FALSE	FALSE
ISOC1	isochorismatase domain containing 1 [Source:HGNC Symbol;Acc:HGNC:24254]	FALSE	FALSE	TRUE
ITGB1BP1	integrin subunit beta 1 binding protein 1 [Source:HGNC Symbol;Acc:HGNC:23927]	TRUE	FALSE	FALSE
ITPA	inosine triphosphatase [Source:HGNC Symbol;Acc:HGNC:6176]	TRUE	FALSE	FALSE
JTB	jumping translocation breakpoint [Source:HGNC Symbol;Acc:HGNC:6201]	FALSE	FALSE	TRUE
KANK1	KN motif and ankyrin repeat domains 1 [Source:HGNC Symbol;Acc:HGNC:19309]	FALSE	TRUE	FALSE
KDM5B	lysine demethylase 5B [Source:HGNC Symbol;Acc:HGNC:18039]	FALSE	FALSE	TRUE
KEL	Kell metallo-endopeptidase (Kell blood group) [Source:HGNC Symbol;Acc:HGNC:6308]	FALSE	FALSE	TRUE
KIAA1109	KIAA1109 [Source:HGNC Symbol;Acc:HGNC:26953]	TRUE	FALSE	FALSE
KIAA2013	KIAA2013 [Source:HGNC Symbol;Acc:HGNC:28513]	FALSE	TRUE	FALSE
KLHL28	kelch like family member 28 [Source:HGNC Symbol;Acc:HGNC:19741]	TRUE	FALSE	FALSE
KNL1	kinetochore scaffold 1 [Source:HGNC Symbol;Acc:HGNC:24054]	FALSE	FALSE	TRUE
KNSTRN	kinetochore localized astrin (SPAG5) binding protein [Source:HGNC Symbol;Acc:HGNC:30767]	FALSE	TRUE	FALSE
KPNA5	karyopherin subunit alpha 5 [Source:HGNC Symbol;Acc:HGNC:6398]	FALSE	TRUE	FALSE
KRT23	keratin 23 [Source:HGNC Symbol;Acc:HGNC:6438]	FALSE	TRUE	FALSE
KRT7	keratin 7 [Source:HGNC Symbol;Acc:HGNC:6445]	FALSE	TRUE	FALSE
LAMTOR4	late endosomal/lysosomal adaptor, MAPK and MTOR activator 4 [Source:HGNC Symbol;Acc:HGNC:33772]	FALSE	FALSE	TRUE
LARP7	La ribonucleoprotein 7, transcriptional regulator [Source:HGNC Symbol;Acc:HGNC:24912]	FALSE	FALSE	TRUE
LDLRAD4	low density lipoprotein receptor class A domain containing 4 [Source:HGNC Symbol;Acc:HGNC:1224]	FALSE	FALSE	TRUE
LGALS2	galectin 2 [Source:HGNC Symbol;Acc:HGNC:6562]	FALSE	FALSE	TRUE
LILRB1	leukocyte immunoglobulin like receptor B1 [Source:HGNC Symbol;Acc:HGNC:6605]	TRUE	FALSE	FALSE
LILRB3	leukocyte immunoglobulin like receptor B3 [Source:HGNC Symbol;Acc:HGNC:6607]	FALSE	TRUE	FALSE
LIN52	lin-52 DREAM MuvB core complex component [Source:HGNC Symbol;Acc:HGNC:19856]	FALSE	TRUE	FALSE
LIN7B	lin-7 homolog B, crumbs cell polarity complex component [Source:HGNC Symbol;Acc:HGNC:17788]	FALSE	FALSE	TRUE
LLGL2	LLGL scribble cell polarity complex component 2 [Source:HGNC Symbol;Acc:HGNC:6629]	TRUE	FALSE	FALSE
LMBR1	limb development membrane protein 1 [Source:HGNC Symbol;Acc:HGNC:13243]	FALSE	TRUE	FALSE
LMBRD1	LMBR1 domain containing 1 [Source:HGNC Symbol;Acc:HGNC:23038]	TRUE	FALSE	FALSE
LOXHD1	lipoxygenase homology domains 1 [Source:HGNC Symbol;Acc:HGNC:26521]	FALSE	TRUE	FALSE
LOXL2	lysyl oxidase like 2 [Source:HGNC Symbol;Acc:HGNC:6666]	TRUE	FALSE	FALSE
LPAR4	lysophosphatidic acid receptor 4 [Source:HGNC Symbol;Acc:HGNC:4478]	FALSE	FALSE	TRUE
LRRC14	leucine rich repeat containing 14 [Source:HGNC Symbol;Acc:HGNC:20419]	FALSE	TRUE	FALSE
LRRC45	leucine rich repeat containing 45 [Source:HGNC Symbol;Acc:HGNC:28302]	TRUE	FALSE	FALSE
LRRC75A	leucine rich repeat containing 75A [Source:HGNC Symbol;Acc:HGNC:32403]	FALSE	FALSE	TRUE
LTB4R2	leukotriene B4 receptor 2 [Source:HGNC Symbol;Acc:HGNC:19260]	FALSE	TRUE	FALSE
LTV1	LTV1 ribosome biogenesis factor [Source:HGNC Symbol;Acc:HGNC:21173]	FALSE	FALSE	TRUE
MANBAL	mannosidase beta like [Source:HGNC Symbol;Acc:HGNC:15799]	FALSE	TRUE	FALSE
MCAT	malonyl-CoA-acyl carrier protein transacylase [Source:HGNC Symbol;Acc:HGNC:29622]	FALSE	FALSE	TRUE
MDK	midkine [Source:HGNC Symbol;Acc:HGNC:6972]	FALSE	TRUE	FALSE
MED12	mediator complex subunit 12 [Source:HGNC Symbol;Acc:HGNC:11957]	FALSE	TRUE	FALSE
METTL8	methyltransferase like 8 [Source:HGNC Symbol;Acc:HGNC:25856]	FALSE	FALSE	TRUE
MFSD9	major facilitator superfamily domain containing 9 [Source:HGNC Symbol;Acc:HGNC:28158]	FALSE	TRUE	FALSE
MICB	MHC class I polypeptide-related sequence B [Source:HGNC Symbol;Acc:HGNC:7091]	FALSE	TRUE	FALSE
MKNK2	MAPK interacting serine/threonine kinase 2 [Source:HGNC Symbol;Acc:HGNC:7111]	TRUE	FALSE	FALSE
MLH3	mutL homolog 3 [Source:HGNC Symbol;Acc:HGNC:7128]	FALSE	FALSE	TRUE
MMAB	metabolism of cobalamin associated B [Source:HGNC Symbol;Acc:HGNC:19331]	FALSE	FALSE	TRUE
MPND	MPN domain containing [Source:HGNC Symbol;Acc:HGNC:25934]	FALSE	FALSE	TRUE
MPP5	membrane palmitoylated protein 5 [Source:HGNC Symbol;Acc:HGNC:18669]	FALSE	TRUE	FALSE
MRPS34	mitochondrial ribosomal protein S34 [Source:HGNC Symbol;Acc:HGNC:16618]	FALSE	FALSE	TRUE
MSMP	microseminoprotein, prostate associated [Source:HGNC Symbol;Acc:HGNC:29663]	TRUE	FALSE	FALSE
MTAP	methylthioadenosine phosphorylase [Source:HGNC Symbol;Acc:HGNC:7413]	FALSE	FALSE	TRUE
MTCH2	mitochondrial carrier 2 [Source:HGNC Symbol;Acc:HGNC:17587]	FALSE	FALSE	TRUE
MTHFD1L	methylenetetrahydrofolate dehydrogenase (NADP+ dependent) 1 like [Source:HGNC Symbol;Acc:HGNC:21055]	FALSE	TRUE	FALSE
MTHFS	methenyltetrahydrofolate synthetase [Source:HGNC Symbol;Acc:HGNC:7437]	FALSE	TRUE	FALSE
MTIF2	mitochondrial translational initiation factor 2 [Source:HGNC Symbol;Acc:HGNC:7441]	FALSE	FALSE	TRUE
MTRNR2L1	MT-RNR2 like 1 [Source:HGNC Symbol;Acc:HGNC:37155]	FALSE	FALSE	TRUE
MYO1E	myosin IE [Source:HGNC Symbol;Acc:HGNC:7599]	FALSE	FALSE	TRUE
NAB1	NGFI-A binding protein 1 [Source:HGNC Symbol;Acc:HGNC:7626]	TRUE	FALSE	FALSE
NAXE	NAD(P)HX epimerase [Source:HGNC Symbol;Acc:HGNC:18453]	FALSE	FALSE	TRUE
NDST2	N-deacetylase and N-sulfotransferase 2 [Source:HGNC Symbol;Acc:HGNC:7681]	TRUE	FALSE	FALSE
NDUFB10	NADH:ubiquinone oxidoreductase subunit B10 [Source:HGNC Symbol;Acc:HGNC:7696]	FALSE	FALSE	TRUE
NECAB2	N-terminal EF-hand calcium binding protein 2 [Source:HGNC Symbol;Acc:HGNC:23746]	FALSE	TRUE	FALSE
NFE2	nuclear factor, erythroid 2 [Source:HGNC Symbol;Acc:HGNC:7780]	FALSE	TRUE	FALSE
NGLY1	N-glycanase 1 [Source:HGNC Symbol;Acc:HGNC:17646]	TRUE	FALSE	FALSE
NMB	neuromedin B [Source:HGNC Symbol;Acc:HGNC:7842]	FALSE	FALSE	TRUE
NOD2	nucleotide binding oligomerization domain containing 2 [Source:HGNC Symbol;Acc:HGNC:5331]	TRUE	FALSE	FALSE
NOP56	NOP56 ribonucleoprotein [Source:HGNC Symbol;Acc:HGNC:15911]	TRUE	FALSE	FALSE
NPIPA5	nuclear pore complex interacting protein family member A5 [Source:HGNC Symbol;Acc:HGNC:41980]	FALSE	TRUE	FALSE
NPM2	nucleophosmin/nucleoplasmin 2 [Source:HGNC Symbol;Acc:HGNC:7930]	TRUE	FALSE	FALSE
NQO2	N-ribosyldihydronicotinamide:quinone reductase 2 [Source:HGNC Symbol;Acc:HGNC:7856]	FALSE	FALSE	TRUE
NSMCE4A	NSE4 homolog A, SMC5-SMC6 complex component [Source:HGNC Symbol;Acc:HGNC:25935]	TRUE	FALSE	FALSE
NVL	nuclear VCP like [Source:HGNC Symbol;Acc:HGNC:8070]	FALSE	TRUE	FALSE
OFD1	OFD1 centriole and centriolar satellite protein [Source:HGNC Symbol;Acc:HGNC:2567]	TRUE	FALSE	FALSE
OMA1	OMA1 zinc metallopeptidase [Source:HGNC Symbol;Acc:HGNC:29661]	FALSE	TRUE	FALSE
OPA1	OPA1 mitochondrial dynamin like GTPase [Source:HGNC Symbol;Acc:HGNC:8140]	TRUE	FALSE	FALSE
OTUD4	OTU deubiquitinase 4 [Source:HGNC Symbol;Acc:HGNC:24949]	FALSE	FALSE	TRUE
PALLD	palladin, cytoskeletal associated protein [Source:HGNC Symbol;Acc:HGNC:17068]	FALSE	TRUE	FALSE
PARD3B	par-3 family cell polarity regulator beta [Source:HGNC Symbol;Acc:HGNC:14446]	FALSE	TRUE	FALSE
PARP9	poly(ADP-ribose) polymerase family member 9 [Source:HGNC Symbol;Acc:HGNC:24118]	TRUE	FALSE	FALSE
PCM1	pericentriolar material 1 [Source:HGNC Symbol;Acc:HGNC:8727]	TRUE	FALSE	FALSE
PCYOX1	prenylcysteine oxidase 1 [Source:HGNC Symbol;Acc:HGNC:20588]	TRUE	FALSE	FALSE
PCYOX1L	prenylcysteine oxidase 1 like [Source:HGNC Symbol;Acc:HGNC:28477]	TRUE	FALSE	FALSE
PDPR	pyruvate dehydrogenase phosphatase regulatory subunit [Source:HGNC Symbol;Acc:HGNC:30264]	TRUE	FALSE	FALSE
PEX11G	peroxisomal biogenesis factor 11 gamma [Source:HGNC Symbol;Acc:HGNC:20208]	FALSE	FALSE	TRUE
PEX13	peroxisomal biogenesis factor 13 [Source:HGNC Symbol;Acc:HGNC:8855]	FALSE	TRUE	FALSE
PEX6	peroxisomal biogenesis factor 6 [Source:HGNC Symbol;Acc:HGNC:8859]	TRUE	FALSE	FALSE
PGD	phosphogluconate dehydrogenase [Source:HGNC Symbol;Acc:HGNC:8891]	FALSE	FALSE	TRUE
PGP	phosphoglycolate phosphatase [Source:HGNC Symbol;Acc:HGNC:8909]	FALSE	FALSE	TRUE
PHF11	PHD finger protein 11 [Source:HGNC Symbol;Acc:HGNC:17024]	TRUE	FALSE	FALSE
PHLDB3	pleckstrin homology like domain family B member 3 [Source:HGNC Symbol;Acc:HGNC:30499]	FALSE	TRUE	FALSE
PI4KB	phosphatidylinositol 4-kinase beta [Source:HGNC Symbol;Acc:HGNC:8984]	TRUE	FALSE	FALSE
PIK3R4	phosphoinositide-3-kinase regulatory subunit 4 [Source:HGNC Symbol;Acc:HGNC:8982]	FALSE	FALSE	TRUE
PINK1	PTEN induced kinase 1 [Source:HGNC Symbol;Acc:HGNC:14581]	FALSE	FALSE	TRUE
PIP4K2C	phosphatidylinositol-5-phosphate 4-kinase type 2 gamma [Source:HGNC Symbol;Acc:HGNC:23786]	TRUE	FALSE	FALSE
PLCB1	phospholipase C beta 1 [Source:HGNC Symbol;Acc:HGNC:15917]	FALSE	TRUE	FALSE
PLXDC1	plexin domain containing 1 [Source:HGNC Symbol;Acc:HGNC:20945]	FALSE	FALSE	TRUE
PNOC	prepronociceptin [Source:HGNC Symbol;Acc:HGNC:9163]	FALSE	TRUE	FALSE
PNPLA4	patatin like phospholipase domain containing 4 [Source:HGNC Symbol;Acc:HGNC:24887]	FALSE	FALSE	TRUE
POLR1C	RNA polymerase I and III subunit C [Source:HGNC Symbol;Acc:HGNC:20194]	FALSE	TRUE	FALSE
PPIL4	peptidylprolyl isomerase like 4 [Source:HGNC Symbol;Acc:HGNC:15702]	FALSE	FALSE	TRUE
PPP1R12A	protein phosphatase 1 regulatory subunit 12A [Source:HGNC Symbol;Acc:HGNC:7618]	FALSE	FALSE	TRUE
PPP1R12B	protein phosphatase 1 regulatory subunit 12B [Source:HGNC Symbol;Acc:HGNC:7619]	FALSE	FALSE	TRUE
PREB	prolactin regulatory element binding [Source:HGNC Symbol;Acc:HGNC:9356]	TRUE	FALSE	FALSE
PRKRIP1	PRKR interacting protein 1 [Source:HGNC Symbol;Acc:HGNC:21894]	TRUE	FALSE	FALSE
PRMT5	protein arginine methyltransferase 5 [Source:HGNC Symbol;Acc:HGNC:10894]	FALSE	FALSE	TRUE
PRMT9	protein arginine methyltransferase 9 [Source:HGNC Symbol;Acc:HGNC:25099]	FALSE	FALSE	TRUE
PRPF40A	pre-mRNA processing factor 40 homolog A [Source:HGNC Symbol;Acc:HGNC:16463]	FALSE	FALSE	TRUE
PRR4	proline rich 4 [Source:HGNC Symbol;Acc:HGNC:18020]	FALSE	FALSE	TRUE
PRSS36	serine protease 36 [Source:HGNC Symbol;Acc:HGNC:26906]	FALSE	TRUE	FALSE
PSME2	proteasome activator subunit 2 [Source:HGNC Symbol;Acc:HGNC:9569]	TRUE	FALSE	FALSE
PTGDS	prostaglandin D2 synthase [Source:HGNC Symbol;Acc:HGNC:9592]	FALSE	TRUE	FALSE
PUDP	pseudouridine 5'-phosphatase [Source:HGNC Symbol;Acc:HGNC:16818]	FALSE	FALSE	TRUE
PUS7	pseudouridine synthase 7 [Source:HGNC Symbol;Acc:HGNC:26033]	FALSE	FALSE	TRUE
QSOX1	quiescin sulfhydryl oxidase 1 [Source:HGNC Symbol;Acc:HGNC:9756]	FALSE	FALSE	TRUE
R3HCC1L	R3H domain and coiled-coil containing 1 like [Source:HGNC Symbol;Acc:HGNC:23512]	FALSE	TRUE	FALSE
RAB24	RAB24, member RAS oncogene family [Source:HGNC Symbol;Acc:HGNC:9765]	TRUE	FALSE	FALSE
RAD23A	RAD23 homolog A, nucleotide excision repair protein [Source:HGNC Symbol;Acc:HGNC:9812]	TRUE	FALSE	FALSE
RAD51B	RAD51 paralog B [Source:HGNC Symbol;Acc:HGNC:9822]	TRUE	FALSE	FALSE
RAD52	RAD52 homolog, DNA repair protein [Source:HGNC Symbol;Acc:HGNC:9824]	FALSE	TRUE	FALSE
RASA4	RAS p21 protein activator 4 [Source:HGNC Symbol;Acc:HGNC:23181]	FALSE	FALSE	TRUE
RASSF4	Ras association domain family member 4 [Source:HGNC Symbol;Acc:HGNC:20793]	TRUE	FALSE	FALSE
RBM34	RNA binding motif protein 34 [Source:HGNC Symbol;Acc:HGNC:28965]	TRUE	FALSE	FALSE
RBM41	RNA binding motif protein 41 [Source:HGNC Symbol;Acc:HGNC:25617]	FALSE	TRUE	FALSE
RBM6	RNA binding motif protein 6 [Source:HGNC Symbol;Acc:HGNC:9903]	TRUE	FALSE	FALSE
RHCE	Rh blood group CcEe antigens [Source:HGNC Symbol;Acc:HGNC:10008]	FALSE	TRUE	FALSE
RIPOR2	RHO family interacting cell polarization regulator 2 [Source:HGNC Symbol;Acc:HGNC:13872]	TRUE	FALSE	FALSE
RNASE3	ribonuclease A family member 3 [Source:HGNC Symbol;Acc:HGNC:10046]	FALSE	TRUE	FALSE
RNF187	ring finger protein 187 [Source:HGNC Symbol;Acc:HGNC:27146]	FALSE	FALSE	TRUE
RNF213	ring finger protein 213 [Source:HGNC Symbol;Acc:HGNC:14539]	TRUE	FALSE	FALSE
RPL13A	ribosomal protein L13a [Source:HGNC Symbol;Acc:HGNC:10304]	FALSE	FALSE	TRUE
RPL8	ribosomal protein L8 [Source:HGNC Symbol;Acc:HGNC:10368]	FALSE	FALSE	TRUE
RPLP2	ribosomal protein lateral stalk subunit P2 [Source:HGNC Symbol;Acc:HGNC:10377]	FALSE	FALSE	TRUE
RPS10	ribosomal protein S10 [Source:HGNC Symbol;Acc:HGNC:10383]	FALSE	FALSE	TRUE
RPS14	ribosomal protein S14 [Source:HGNC Symbol;Acc:HGNC:10387]	FALSE	FALSE	TRUE
RPSA	ribosomal protein SA [Source:HGNC Symbol;Acc:HGNC:6502]	FALSE	FALSE	TRUE
RSAD1	radical S-adenosyl methionine domain containing 1 [Source:HGNC Symbol;Acc:HGNC:25634]	TRUE	FALSE	FALSE
RSPH3	radial spoke head 3 [Source:HGNC Symbol;Acc:HGNC:21054]	TRUE	FALSE	FALSE
S100A5	S100 calcium binding protein A5 [Source:HGNC Symbol;Acc:HGNC:10495]	TRUE	FALSE	FALSE
S100P	S100 calcium binding protein P [Source:HGNC Symbol;Acc:HGNC:10504]	FALSE	TRUE	FALSE
S1PR3	sphingosine-1-phosphate receptor 3 [Source:HGNC Symbol;Acc:HGNC:3167]	FALSE	TRUE	FALSE
SAP30L	SAP30 like [Source:HGNC Symbol;Acc:HGNC:25663]	TRUE	FALSE	FALSE
SAPCD2	suppressor APC domain containing 2 [Source:HGNC Symbol;Acc:HGNC:28055]	FALSE	TRUE	FALSE
SAT2	spermidine/spermine N1-acetyltransferase family member 2 [Source:HGNC Symbol;Acc:HGNC:23160]	TRUE	FALSE	FALSE
SCGB1C1	secretoglobin family 1C member 1 [Source:HGNC Symbol;Acc:HGNC:18394]	FALSE	FALSE	TRUE
SCGB3A2	secretoglobin family 3A member 2 [Source:HGNC Symbol;Acc:HGNC:18391]	FALSE	TRUE	FALSE
SCO2	synthesis of cytochrome C oxidase 2 [Source:HGNC Symbol;Acc:HGNC:10604]	TRUE	FALSE	FALSE
SCUBE2	signal peptide, CUB domain and EGF like domain containing 2 [Source:HGNC Symbol;Acc:HGNC:30425]	TRUE	FALSE	FALSE
SDHA	succinate dehydrogenase complex flavoprotein subunit A [Source:HGNC Symbol;Acc:HGNC:10680]	FALSE	FALSE	TRUE
SERPINI1	serpin family I member 1 [Source:HGNC Symbol;Acc:HGNC:8943]	FALSE	TRUE	FALSE
SFXN4	sideroflexin 4 [Source:HGNC Symbol;Acc:HGNC:16088]	TRUE	FALSE	FALSE
SIGLEC1	sialic acid binding Ig like lectin 1 [Source:HGNC Symbol;Acc:HGNC:11127]	TRUE	FALSE	FALSE
SIGLEC11	sialic acid binding Ig like lectin 11 [Source:HGNC Symbol;Acc:HGNC:15622]	FALSE	FALSE	TRUE
SIKE1	suppressor of IKBKE 1 [Source:HGNC Symbol;Acc:HGNC:26119]	FALSE	FALSE	TRUE
SLC20A1	solute carrier family 20 member 1 [Source:HGNC Symbol;Acc:HGNC:10946]	TRUE	FALSE	FALSE
SLC22A18AS	solute carrier family 22 member 18 antisense [Source:HGNC Symbol;Acc:HGNC:10965]	FALSE	FALSE	TRUE
SLC25A20	solute carrier family 25 member 20 [Source:HGNC Symbol;Acc:HGNC:1421]	FALSE	TRUE	FALSE
SLC2A1	solute carrier family 2 member 1 [Source:HGNC Symbol;Acc:HGNC:11005]	FALSE	TRUE	FALSE
SLC35E2B	solute carrier family 35 member E2B [Source:HGNC Symbol;Acc:HGNC:33941]	FALSE	TRUE	FALSE
SLC45A4	solute carrier family 45 member 4 [Source:HGNC Symbol;Acc:HGNC:29196]	FALSE	TRUE	FALSE
SLC5A6	solute carrier family 5 member 6 [Source:HGNC Symbol;Acc:HGNC:11041]	TRUE	FALSE	FALSE
SLC6A12	solute carrier family 6 member 12 [Source:HGNC Symbol;Acc:HGNC:11045]	FALSE	TRUE	FALSE
SLFN11	schlafen family member 11 [Source:HGNC Symbol;Acc:HGNC:26633]	FALSE	TRUE	FALSE
SLFN12	schlafen family member 12 [Source:HGNC Symbol;Acc:HGNC:25500]	FALSE	TRUE	FALSE
SMARCD1	SWI/SNF related, matrix associated, actin dependent regulator of chromatin, subfamily d, member 1 [Source:HGNC Symbol;Acc:HGNC:11106]	FALSE	TRUE	FALSE
SMC4	structural maintenance of chromosomes 4 [Source:HGNC Symbol;Acc:HGNC:14013]	FALSE	FALSE	TRUE
SMN1	survival of motor neuron 1, telomeric [Source:HGNC Symbol;Acc:HGNC:11117]	FALSE	FALSE	TRUE
SMN2	survival of motor neuron 2, centromeric [Source:HGNC Symbol;Acc:HGNC:11118]	FALSE	FALSE	TRUE
SNX19	sorting nexin 19 [Source:HGNC Symbol;Acc:HGNC:21532]	FALSE	TRUE	FALSE
SP100	SP100 nuclear antigen [Source:HGNC Symbol;Acc:HGNC:11206]	TRUE	FALSE	FALSE
SP110	SP110 nuclear body protein [Source:HGNC Symbol;Acc:HGNC:5401]	TRUE	FALSE	FALSE
SPATS2L	spermatogenesis associated serine rich 2 like [Source:HGNC Symbol;Acc:HGNC:24574]	FALSE	TRUE	FALSE
SPOP	speckle type BTB/POZ protein [Source:HGNC Symbol;Acc:HGNC:11254]	FALSE	FALSE	TRUE
SQLE	squalene epoxidase [Source:HGNC Symbol;Acc:HGNC:11279]	FALSE	FALSE	TRUE
SREK1IP1	SREK1 interacting protein 1 [Source:HGNC Symbol;Acc:HGNC:26716]	FALSE	FALSE	TRUE
SRP9	signal recognition particle 9 [Source:HGNC Symbol;Acc:HGNC:11304]	TRUE	FALSE	FALSE
SSB	small RNA binding exonuclease protection factor La [Source:HGNC Symbol;Acc:HGNC:11316]	FALSE	FALSE	TRUE
STAT2	signal transducer and activator of transcription 2 [Source:HGNC Symbol;Acc:HGNC:11363]	TRUE	FALSE	FALSE
STX5	syntaxin 5 [Source:HGNC Symbol;Acc:HGNC:11440]	FALSE	FALSE	TRUE
SYNC	syncoilin, intermediate filament protein [Source:HGNC Symbol;Acc:HGNC:28897]	FALSE	FALSE	TRUE
SZT2	SZT2 subunit of KICSTOR complex [Source:HGNC Symbol;Acc:HGNC:29040]	TRUE	TRUE	FALSE
TANC2	tetratricopeptide repeat, ankyrin repeat and coiled-coil containing 2 [Source:HGNC Symbol;Acc:HGNC:30212]	FALSE	FALSE	TRUE
TBL2	transducin beta like 2 [Source:HGNC Symbol;Acc:HGNC:11586]	FALSE	TRUE	FALSE
TCF20	transcription factor 20 [Source:HGNC Symbol;Acc:HGNC:11631]	FALSE	TRUE	FALSE
TEP1	telomerase associated protein 1 [Source:HGNC Symbol;Acc:HGNC:11726]	TRUE	FALSE	FALSE
TFAM	transcription factor A, mitochondrial [Source:HGNC Symbol;Acc:HGNC:11741]	FALSE	FALSE	TRUE
TLCD1	TLC domain containing 1 [Source:HGNC Symbol;Acc:HGNC:25177]	FALSE	FALSE	TRUE
TLR1	toll like receptor 1 [Source:HGNC Symbol;Acc:HGNC:11847]	FALSE	TRUE	FALSE
TMEM165	transmembrane protein 165 [Source:HGNC Symbol;Acc:HGNC:30760]	FALSE	TRUE	FALSE
TMEM182	transmembrane protein 182 [Source:HGNC Symbol;Acc:HGNC:26391]	FALSE	TRUE	FALSE
TMEM184B	transmembrane protein 184B [Source:HGNC Symbol;Acc:HGNC:1310]	FALSE	FALSE	TRUE
TMEM268	transmembrane protein 268 [Source:HGNC Symbol;Acc:HGNC:24513]	TRUE	FALSE	FALSE
TMEM38B	transmembrane protein 38B [Source:HGNC Symbol;Acc:HGNC:25535]	FALSE	TRUE	FALSE
TMEM60	transmembrane protein 60 [Source:HGNC Symbol;Acc:HGNC:21754]	FALSE	TRUE	FALSE
TMEM80	transmembrane protein 80 [Source:HGNC Symbol;Acc:HGNC:27453]	FALSE	TRUE	FALSE
TMPRSS3	transmembrane serine protease 3 [Source:HGNC Symbol;Acc:HGNC:11877]	TRUE	FALSE	FALSE
TMSB4Y	thymosin beta 4 Y-linked [Source:HGNC Symbol;Acc:HGNC:11882]	FALSE	FALSE	TRUE
TNFRSF10D	TNF receptor superfamily member 10d [Source:HGNC Symbol;Acc:HGNC:11907]	TRUE	FALSE	FALSE
TOB2	transducer of ERBB2, 2 [Source:HGNC Symbol;Acc:HGNC:11980]	FALSE	TRUE	FALSE
TOLLIP	toll interacting protein [Source:HGNC Symbol;Acc:HGNC:16476]	FALSE	FALSE	TRUE
TOX4	TOX high mobility group box family member 4 [Source:HGNC Symbol;Acc:HGNC:20161]	FALSE	FALSE	TRUE
TPSB2	tryptase beta 2 (gene/pseudogene) [Source:HGNC Symbol;Acc:HGNC:14120]	TRUE	FALSE	FALSE
TRAPPC2L	trafficking protein particle complex 2 like [Source:HGNC Symbol;Acc:HGNC:30887]	FALSE	FALSE	TRUE
TRIM22	tripartite motif containing 22 [Source:HGNC Symbol;Acc:HGNC:16379]	TRUE	FALSE	FALSE
TRIP10	thyroid hormone receptor interactor 10 [Source:HGNC Symbol;Acc:HGNC:12304]	FALSE	TRUE	FALSE
TRMT2B	tRNA methyltransferase 2 homolog B [Source:HGNC Symbol;Acc:HGNC:25748]	TRUE	FALSE	FALSE
TSPAN17	tetraspanin 17 [Source:HGNC Symbol;Acc:HGNC:13594]	TRUE	FALSE	FALSE
TTC12	tetratricopeptide repeat domain 12 [Source:HGNC Symbol;Acc:HGNC:23700]	TRUE	FALSE	FALSE
TYMP	thymidine phosphorylase [Source:HGNC Symbol;Acc:HGNC:3148]	TRUE	FALSE	FALSE
U2AF1L4	U2 small nuclear RNA auxiliary factor 1 like 4 [Source:HGNC Symbol;Acc:HGNC:23020]	TRUE	FALSE	FALSE
U2SURP	U2 snRNP associated SURP domain containing [Source:HGNC Symbol;Acc:HGNC:30855]	TRUE	FALSE	FALSE
UBA52	ubiquitin A-52 residue ribosomal protein fusion product 1 [Source:HGNC Symbol;Acc:HGNC:12458]	FALSE	FALSE	TRUE
UCP3	uncoupling protein 3 [Source:HGNC Symbol;Acc:HGNC:12519]	FALSE	FALSE	TRUE
UFL1	UFM1 specific ligase 1 [Source:HGNC Symbol;Acc:HGNC:23039]	FALSE	FALSE	TRUE
ULK4	unc-51 like kinase 4 [Source:HGNC Symbol;Acc:HGNC:15784]	FALSE	FALSE	TRUE
UNG	uracil DNA glycosylase [Source:HGNC Symbol;Acc:HGNC:12572]	FALSE	TRUE	TRUE
UPF3A	UPF3A regulator of nonsense mediated mRNA decay [Source:HGNC Symbol;Acc:HGNC:20332]	FALSE	TRUE	FALSE
UQCRC1	ubiquinol-cytochrome c reductase core protein 1 [Source:HGNC Symbol;Acc:HGNC:12585]	FALSE	FALSE	TRUE
USF1	upstream transcription factor 1 [Source:HGNC Symbol;Acc:HGNC:12593]	TRUE	FALSE	FALSE
USP40	ubiquitin specific peptidase 40 [Source:HGNC Symbol;Acc:HGNC:20069]	TRUE	FALSE	FALSE
VMA21	vacuolar ATPase assembly factor VMA21 [Source:HGNC Symbol;Acc:HGNC:22082]	FALSE	FALSE	TRUE
VPS45	vacuolar protein sorting 45 homolog [Source:HGNC Symbol;Acc:HGNC:14579]	FALSE	TRUE	FALSE
VXN	vexin [Source:HGNC Symbol;Acc:HGNC:28498]	FALSE	FALSE	TRUE
WASHC1	WASH complex subunit 1 [Source:HGNC Symbol;Acc:HGNC:24361]	FALSE	FALSE	TRUE
WDR36	WD repeat domain 36 [Source:HGNC Symbol;Acc:HGNC:30696]	FALSE	FALSE	TRUE
WFDC3	WAP four-disulfide core domain 3 [Source:HGNC Symbol;Acc:HGNC:15957]	FALSE	FALSE	TRUE
XAF1	XIAP associated factor 1 [Source:HGNC Symbol;Acc:HGNC:30932]	TRUE	FALSE	FALSE
XPOT	exportin for tRNA [Source:HGNC Symbol;Acc:HGNC:12826]	FALSE	FALSE	TRUE
XPR1	xenotropic and polytropic retrovirus receptor 1 [Source:HGNC Symbol;Acc:HGNC:12827]	FALSE	FALSE	TRUE
ZBP1	Z-DNA binding protein 1 [Source:HGNC Symbol;Acc:HGNC:16176]	FALSE	TRUE	FALSE
ZC3H4	zinc finger CCCH-type containing 4 [Source:HGNC Symbol;Acc:HGNC:17808]	FALSE	TRUE	FALSE
ZDHHC4	zinc finger DHHC-type palmitoyltransferase 4 [Source:HGNC Symbol;Acc:HGNC:18471]	FALSE	FALSE	TRUE
ZDHHC6	zinc finger DHHC-type palmitoyltransferase 6 [Source:HGNC Symbol;Acc:HGNC:19160]	FALSE	FALSE	TRUE
ZG16B	zymogen granule protein 16B [Source:HGNC Symbol;Acc:HGNC:30456]	FALSE	TRUE	FALSE
ZMYM4	zinc finger MYM-type containing 4 [Source:HGNC Symbol;Acc:HGNC:13055]	FALSE	FALSE	TRUE
ZNF124	zinc finger protein 124 [Source:HGNC Symbol;Acc:HGNC:12907]	FALSE	FALSE	TRUE
ZNF384	zinc finger protein 384 [Source:HGNC Symbol;Acc:HGNC:11955]	TRUE	FALSE	FALSE
ZNF418	zinc finger protein 418 [Source:HGNC Symbol;Acc:HGNC:20647]	FALSE	FALSE	TRUE
ZNF45	zinc finger protein 45 [Source:HGNC Symbol;Acc:HGNC:13111]	FALSE	TRUE	FALSE
ZNF544	zinc finger protein 544 [Source:HGNC Symbol;Acc:HGNC:16759]	TRUE	FALSE	FALSE
ZNF559	zinc finger protein 559 [Source:HGNC Symbol;Acc:HGNC:28197]	FALSE	TRUE	FALSE
ZNF638	zinc finger protein 638 [Source:HGNC Symbol;Acc:HGNC:17894]	TRUE	FALSE	FALSE
ZNF714	zinc finger protein 714 [Source:HGNC Symbol;Acc:HGNC:27124]	TRUE	FALSE	FALSE
ZNF737	zinc finger protein 737 [Source:HGNC Symbol;Acc:HGNC:32468]	FALSE	FALSE	TRUE
ZNF821	zinc finger protein 821 [Source:HGNC Symbol;Acc:HGNC:28043]	FALSE	TRUE	FALSE

## Sheet: NP_ClinModels_LipidList
LIPID			SELECTED IN MODEL (TRUE/FALSE)
Lipid	Name	Class	MOTOR	COGNITION	EMOTION
N1222	2319_([M-H]-)_LPE 18a:1_C23H46NO7P	LPE	TRUE	FALSE	FALSE
N1234	2318_([M-H]-)_LPE 18a:0_C23H48NO7P	LPE	TRUE	FALSE	FALSE
N1235	2318_([M-H]-)_LPE 18a:0_C23H48NO7P	LPE	TRUE	FALSE	FALSE
N1241	2507_([M-H]-)_LPG 16a:1_C22H43O9P	LPG	TRUE	FALSE	FALSE
N1375	2329_([M-H]-)_LPE 20a:1_C25H50NO7P	LPE	TRUE	FALSE	FALSE
N1390	2328_([M-H]-)_LPE 20a:0_C25H52NO7P	LPE	TRUE	FALSE	FALSE
N1687	2924_([M-H]-)_LPS 21a:0_C27H54NO9P	LPS	TRUE	FALSE	FALSE
N2329	4010_([M-H]-)_PE 34e:3_C39H74NO7P // 4100_([M-H]-)_PE 34p:2_C39H74NO7P	PE	TRUE	FALSE	TRUE
N2340	4009_([M-H]-)_PE 34e:2_C39H76NO7P // 4099_([M-H]-)_PE 34p:1_C39H76NO7P	PE	TRUE	TRUE	TRUE
N2428	3831_([M-H]-)_PE 34a:1_C39H76NO8P	PE	FALSE	TRUE	TRUE
N2451	4022_([M-H]-)_PE 36e:6_C41H72NO7P // 4111_([M-H]-)_PE 36p:5_C41H72NO7P	PE	TRUE	FALSE	FALSE
N2455	4217_([M-H]-)_PG 32a:0_C38H75O10P	PG	TRUE	FALSE	FALSE
N2465	4021_([M-H]-)_PE 36e:5_C41H74NO7P // 4110_([M-H]-)_PE 36p:4_C41H74NO7P	PE	FALSE	TRUE	FALSE
N2785	5180_([M-H]-)_PS 36p:4_C42H74NO9P	PS	TRUE	FALSE	TRUE
N3044	5147_([M-H]-)_PS 38e:4_C44H80NO9P	PS	FALSE	FALSE	TRUE
N3058	5059_([M-H]-)_PS 37a:3_C43H78NO10P	PS	FALSE	TRUE	FALSE
N3075	5058_([M-H]-)_PS 37a:2_C43H80NO10P	PS	FALSE	FALSE	TRUE
N3160	5068_([M-H]-)_PS 38a:4_C44H78NO10P	PS	FALSE	FALSE	TRUE
N3170	5067_([M-H]-)_PS 38a:3_C44H80NO10P	PS	TRUE	FALSE	FALSE
N319	14_([M-H]-)_FA C16:1_C16H30O2	FA	TRUE	FALSE	FALSE
N3263	5079_([M-H]-)_PS 39a:5_C45H78NO10P	PS	TRUE	TRUE	FALSE
N3283	5077_([M-H]-)_PS 39a:3_C45H82NO10P	PS	FALSE	TRUE	FALSE
N3284	5190_([M-H]-)_PS 40p:2_C46H86NO9P	PS	FALSE	TRUE	FALSE
N3311	5075_([M-H]-)_PS 39a:1_C45H86NO10P	PS	TRUE	FALSE	FALSE
N3361	4531_([M-H]-)_PI 34a:1_C43H81O13P	PI	TRUE	FALSE	FALSE
N3397	5087_([M-H]-)_PS 40a:3_C46H84NO10P	PS	FALSE	TRUE	FALSE
N3459	898_([M-H]-)_Su (d18:2/C20:1(OH))_C44H81O12NS	Su	FALSE	FALSE	TRUE
N3505	5198_([M-H]-)_PS 42p:4_C48H86NO9P	PS	FALSE	FALSE	TRUE
N3520	5159_([M-H]-)_PS 42e:4_C48H88NO9P // 5197_([M-H]-)_PS 42p:3_C48H88NO9P	PS	FALSE	FALSE	TRUE
N3581	4546_([M-H]-)_PI 36a:3_C45H81O13P	PI	TRUE	FALSE	FALSE
N3607	4545_([M-H]-)_PI 36a:2_C45H83O13P	PI	TRUE	FALSE	FALSE
N3631	4544_([M-H]-)_PI 36a:1_C45H85O13P	PI	TRUE	FALSE	TRUE
N3765	5119_([M-H]-)_PS 43a:5_C49H86NO10P	PS	FALSE	TRUE	FALSE
N3812	4564_([M-H]-)_PI 38a:4_C47H83O13P	PI	TRUE	FALSE	FALSE
N3830	4563_([M-H]-)_PI 38a:3_C47H85O13P	PI	TRUE	FALSE	FALSE
N3840	3972_([M-H]-)_PE 48a:12_C53H80NO8P	PE	TRUE	FALSE	FALSE
N3856	3971_([M-H]-)_PE 48a:11_C53H82NO8P	PE	TRUE	FALSE	FALSE
N3935	902_([M-H]-)_Su (d18:2/C24:1(OH))_C48H89O12NS	Su	TRUE	FALSE	FALSE
N3950	887_([M-H]-)_Su (d18:1/C24:1(OH))_C48H91O12NS	Su	FALSE	FALSE	TRUE
N3999	4585_([M-H]-)_PI 40a:5_C49H85O13P	PI	TRUE	FALSE	TRUE
N4329	4624_([M-H]-)_PI 44a:4_C53H95O13P	PI	TRUE	FALSE	FALSE
N440	20_([M-H]-)_FA C18:2_C18H32O2	FA	TRUE	FALSE	FALSE
N452	19_([M-H]-)_FA C18:1_C18H34O2	FA	TRUE	FALSE	FALSE
N4905	7018_([M-H]-)_GM3 (d18:1/18:0)_C59H108N2O21	MonoSGL	TRUE	FALSE	FALSE
N4945	7023_([M-H]-)_GM3(d18:1/20:0)_C61H112N2O21	MonoSGL	TRUE	FALSE	FALSE
N4976	7027_([M-H]-)_GM3 (d18:1/22:0)_C63H116N2O21	MonoSGL	TRUE	FALSE	FALSE
P10278	6465_([M+NH4]+)_TG 74:7_C77H136O6	TG	TRUE	FALSE	FALSE
P10371	6504_([M+NH4]+)_TG 76:8_C79H138O6	TG	FALSE	FALSE	TRUE
P10428	6522_([M+NH4]+)_TG 77:7_C80H142O6	TG	FALSE	FALSE	TRUE
P1150	82_([M+Na]+)_Linoleamide_C18H33NO	PFAA	FALSE	FALSE	TRUE
P1788	5310_([M+NH4]+)_MG 18a:2_C21H38O4	MG	FALSE	TRUE	FALSE
P1821	5309_([M+NH4]+)_MG 18a:1_C21H40O4	MG	FALSE	FALSE	TRUE
P2667	2178_([M+H]+)_LPC 16p:1_C24H48NO6P	LPC	TRUE	FALSE	FALSE
P2693	2117_([M+H]+)_LPC 15a:1_C23H46NO7P	LPC	TRUE	FALSE	FALSE
P2839	2121_([M+H]+)_LPC 16a:0_C24H50NO7P	LPC	TRUE	FALSE	FALSE
P2880	2130_([M+H]+)_LPC 17a:4_C25H44NO7P	LPC	FALSE	TRUE	FALSE
P2976	2126_([M+H]+)_LPC 17a:0_C25H52NO7P	LPC	TRUE	FALSE	FALSE
P3019	2121_([M+Na]+)_LPC 16a:0_C24H50NO7P	LPC	TRUE	FALSE	FALSE
P3046	9055_([M+NH4]+)_WE (34:3)_C34H62O2	Wax	FALSE	TRUE	FALSE
P3071	2134_([M+H]+)_LPC 18a:1_C26H52NO7P	LPC	TRUE	FALSE	FALSE
P3091	2133_([M+H]+)_LPC 18a:0_C26H54NO7P	LPC	TRUE	FALSE	FALSE
P3196	2138_([M+H]+)_LPC 19a:0_C27H56NO7P	LPC	TRUE	FALSE	FALSE
P3224	168_([M+H]+)_Cer (d18:1/C15:0(OH))_C33H65O4N	Cer	FALSE	FALSE	TRUE
P3237	2135_([M+Na]+)_LPC 18a:2_C26H50NO7P	LPC	FALSE	FALSE	TRUE
P3238	2148_([M+H]+)_LPC 20a:5_C28H48NO7P	LPC	TRUE	FALSE	FALSE
P3272	2133_([M+Na]+)_LPC 18a:0_C26H54NO7P	LPC	TRUE	FALSE	FALSE
P3336	2143_([M+H]+)_LPC 20a:0_C28H58NO7P	LPC	TRUE	FALSE	FALSE
P3427	2148_([M+Na]+)_LPC 20a:5_C28H48NO7P	LPC	TRUE	FALSE	FALSE
P3459	122_([M+H]+)_Cer (d18:1/C18:0)_C36H71O3N	Cer	FALSE	TRUE	FALSE
P3613	2155_([M+H]+)_LPC 22a:0_C30H62NO7P	LPC	TRUE	FALSE	FALSE
P3690	122_([M+Na]+)_Cer (d18:1/C18:0)_C36H71O3N	Cer	FALSE	TRUE	FALSE
P3922	2167_([M+H]+)_LPC 24a:0_C32H66NO7P	LPC	FALSE	FALSE	TRUE
P3959	6803_([M+NH4]+)_14:1 Cholesteryl ester_C41H70O2	Chol.Ester	FALSE	FALSE	TRUE
P3980	6802_([M+NH4]+)_14:0 Cholesteryl ester_C41H72O2	Chol.Ester	FALSE	FALSE	TRUE
P4015	6803_([M+Na]+)_14:1 Cholesteryl ester_C41H70O2	Chol.Ester	FALSE	FALSE	TRUE
P4041	6802_([M+Na]+)_14:0 Cholesteryl ester_C41H72O2	Chol.Ester	FALSE	FALSE	TRUE
P4080	6807_([M+H]+)_16:1 Cholesteryl ester_C43H74O2	Chol.Ester	FALSE	FALSE	TRUE
P4138	6804_([M+NH4]+)_15:0 Cholesteryl ester_C42H74O2	Chol.Ester	FALSE	FALSE	TRUE
P4162	135_([M+H-H2O]+)_Cer (d18:1/C24:1)_C42H81O3N	Cer	FALSE	FALSE	TRUE
P4216	5513_([M+NH4]+)_DG 36a:4_C39H68O5	DG	FALSE	FALSE	TRUE
P4247	2173_([M+H]+)_LPC 26a:0_C34H70NO7P // 3558_([M+H]+)_PC 26e:0_C34H70NO7P	LPC//PC	FALSE	FALSE	TRUE
P4289	6808_([M+NH4]+)_16:2 Cholesteryl ester_C43H72O2	Chol.Ester	TRUE	FALSE	FALSE
P4297	5513_([M+Na]+)_DG 36a:4_C39H68O5	DG	FALSE	FALSE	TRUE
P4313	5507_([M+NH4]+)_DG 36a:1_C39H74O5	DG	FALSE	FALSE	TRUE
P4315	6807_([M+NH4]+)_16:1 Cholesteryl ester_C43H74O2	Chol.Ester	FALSE	FALSE	TRUE
P4316	6807_([M+NH4]+)_16:1 Cholesteryl ester_C43H74O2	Chol.Ester	FALSE	FALSE	TRUE
P4339	6806_([M+NH4]+)_16:0 Cholesteryl ester_C43H76O2	Chol.Ester	FALSE	FALSE	TRUE
P4340	6806_([M+NH4]+)_16:0 Cholesteryl ester_C43H76O2	Chol.Ester	FALSE	FALSE	TRUE
P4368	137_([M+H-H2O]+)_Cer (d18:1/C25:1)_C43H83O3N	Cer	FALSE	FALSE	TRUE
P4512	133_([M+Na]+)_Cer (d18:1/C23:1)_C41H79O3N	Cer	FALSE	TRUE	FALSE
P4571	110_([M+Na]+)_Cer (d18:0/C23:0)_C41H83O3N	Cer	TRUE	FALSE	FALSE
P4579	5542_([M+Na]+)_DG 38a:7_C41H66O5	DG	TRUE	FALSE	TRUE
P4618	137_([M+H]+)_Cer (d18:1/C25:1)_C43H83O3N	Cer	FALSE	FALSE	TRUE
P4642	3563_([M+H]+)_PC 28e:0_C36H74NO7P	PC	FALSE	FALSE	TRUE
P4678	5537_([M+NH4]+)_DG 38a:2_C41H76O5	DG	FALSE	FALSE	TRUE
P4720	5533_([M+NH4]+)_DG 38a:1_C41H78O5	DG	FALSE	FALSE	TRUE
P4723	6812_([M+NH4]+)_18:1 Cholesteryl ester_C45H78O2	Chol.Ester	FALSE	FALSE	TRUE
P4724	163_([M+H]+)_Cer (d18:0/C24:0(OH))_C42H85O4N	Cer	TRUE	FALSE	TRUE
P4751	135_([M+Na]+)_Cer (d18:1/C24:1)_C42H81O3N	Cer	FALSE	FALSE	TRUE
P4822	714_([M+H]+)_SM (d18:1/C14:0)_C37H75N2O6P	SM	FALSE	FALSE	TRUE
P4855	701_([M+H]+)_SM (d18:0/C14:0)_C37H77N2O6P	SM	FALSE	FALSE	TRUE
P4864	3401_([M+H]+)_PC 28a:0_C36H72NO8P	PC	FALSE	FALSE	TRUE
P4869	5551_([M+NH4]+)_DG 39a:3_C42H76O5	DG	FALSE	FALSE	TRUE
P4917	5569_([M+NH4]+)_DG 40a:8_C43H68O5	DG	TRUE	FALSE	TRUE
P4958	5568_([M+NH4]+)_DG 40a:7_C43H70O5	DG	TRUE	FALSE	FALSE
P4964	137_([M+Na]+)_Cer (d18:1/C25:1)_C43H83O3N	Cer	FALSE	FALSE	TRUE
P4990	316_([M+H]+)_HexCer (d18:1/C15:0)_C39H75O8N	HexCer	FALSE	FALSE	TRUE
P5004	136_([M+Na]+)_Cer (d18:1/C25:0)_C43H85O3N	Cer	FALSE	FALSE	TRUE
P5006	5569_([M+Na]+)_DG 40a:8_C43H68O5	DG	FALSE	FALSE	TRUE
P5057	716_([M+H]+)_SM (d18:1/C15:0)_C38H77N2O6P	SM	FALSE	FALSE	TRUE
P5079	3571_([M+H]+)_PC 30e:1_C38H76NO7P // 3668_([M+H]+)_PC 30p:0_C38H76NO7P	PC	FALSE	FALSE	TRUE
P5090	163_([M+Na]+)_Cer (d18:0/C24:0(OH))_C42H85O4N	Cer	FALSE	FALSE	TRUE
P5100	702_([M+H]+)_SM (d18:0/C15:0)_C38H79N2O6P	SM	FALSE	FALSE	TRUE
P5118	3570_([M+H]+)_PC 30e:0_C38H78NO7P	PC	FALSE	FALSE	TRUE
P5157	6818_([M+NH4]+)_20:2 Cholesteryl ester_C47H80O2	Chol.Ester	FALSE	FALSE	TRUE
P5191	714_([M+Na]+)_SM (d18:1/C14:0)_C37H75N2O6P	SM	FALSE	FALSE	TRUE
P5215	6816_([M+NH4]+)_20:0 Cholesteryl ester_C47H84O2	Chol.Ester	FALSE	FALSE	TRUE
P5219	701_([M+Na]+)_SM (d18:0/C14:0)_C37H77N2O6P	SM	FALSE	FALSE	TRUE
P5231	3401_([M+Na]+)_PC 28a:0_C36H72NO8P	PC	FALSE	FALSE	TRUE
P5232	3577_([M+H]+)_PC 31e:3_C39H74NO7P // 3673_([M+H]+)_PC 31p:2_C39H74NO7P	PC	TRUE	FALSE	TRUE
P5240	318_([M+H]+)_HexCer (d18:1/C16:0)_C40H77O8N	HexCer	FALSE	FALSE	TRUE
P5319	703_([M+H]+)_SM (d18:0/C16:0)_C39H81N2O6P	SM	FALSE	FALSE	TRUE
P5331	3412_([M+H]+)_PC 30a:0_C38H76NO8P	PC	FALSE	FALSE	TRUE
P5373	717_([M+Na]+)_SM (d18:1/C15:1)_C38H75N2O6P	SM	FALSE	TRUE	TRUE
P5392	716_([M+Na]+)_SM (d18:1/C15:0)_C38H77N2O6P	SM	FALSE	FALSE	TRUE
P5419	3154_([M+NH4]+)_PA 36a:4_C39H68O8P	PA	FALSE	FALSE	TRUE
P5426	5814_([M+Na]+)_TG 40:2_C43H78O6	TG	FALSE	TRUE	FALSE
P5456	5804_([M+Na]+)_TG 40:1_C43H80O6	TG	FALSE	TRUE	FALSE
P5498	5803_([M+Na]+)_TG 40:0_C43H82O6	TG	FALSE	TRUE	FALSE
P5514	3419_([M+H]+)_PC 31a:1_C39H76NO8P	PC	FALSE	FALSE	TRUE
P5522	3581_([M+H]+)_PC 32e:1_C40H80NO7P // 3676_([M+H]+)_PC 32p:0_C40H80NO7P	PC	FALSE	FALSE	TRUE
P5557	3418_([M+H]+)_PC 31a:0_C39H78NO8P	PC	FALSE	TRUE	TRUE
P5641	3589_([M+H]+)_PC 33e:5_C41H74NO7P // 3683_([M+H]+)_PC 33p:4_C41H74NO7P	PC	FALSE	TRUE	FALSE
P5680	703_([M+Na]+)_SM (d18:0/C16:0)_C39H81N2O6P	SM	TRUE	FALSE	TRUE
P5726	3586_([M+H]+)_PC 33e:2_C41H80NO7P // 3680_([M+H]+)_PC 33p:1_C41H80NO7P	PC	TRUE	FALSE	FALSE
P5789	5612_([M+NH4]+)_DG 44a:10_C47H72O5	DG	FALSE	FALSE	TRUE
P5824	5852_([M+NH4]+)_TG 42:2_C45H82O6	TG	FALSE	TRUE	FALSE
P5850	3596_([M+H]+)_PC 34e:5_C42H76NO7P // 3689_([M+H]+)_PC 34p:4_C42H76NO7P	PC	FALSE	FALSE	TRUE
P5857	326_([M+H-H2O]+)_HexCer (d18:1/C20:0)_C44H85O8N	HexCer	FALSE	TRUE	FALSE
P5895	5841_([M+NH4]+)_TG 42:0_C45H86O6	TG	FALSE	TRUE	FALSE
P5912	5852_([M+Na]+)_TG 42:2_C45H82O6	TG	FALSE	TRUE	FALSE
P5923	3418_([M+Na]+)_PC 31a:0_C39H78NO8P	PC	FALSE	FALSE	TRUE
P5963	3434_([M+H]+)_PC 33a:2_C41H78NO8P	PC	FALSE	TRUE	FALSE
P6010	3433_([M+H]+)_PC 33a:1_C41H80NO8P	PC	FALSE	FALSE	TRUE
P6013	3592_([M+H]+)_PC 34e:1_C42H84NO7P // 3685_([M+H]+)_PC 34p:0_C42H84NO7P	PC	FALSE	FALSE	TRUE
P6073	3587_([M+Na]+)_PC 33e:3_C41H78NO7P // 3681_([M+Na]+)_PC 33p:2_C41H78NO7P	PC	TRUE	FALSE	FALSE
P6074	3587_([M+Na]+)_PC 33e:3_C41H78NO7P // 3681_([M+Na]+)_PC 33p:2_C41H78NO7P	PC	TRUE	FALSE	FALSE
P6113	3445_([M+H]+)_PC 34a:4_C42H76NO8P	PC	TRUE	TRUE	FALSE
P6115	3601_([M+H]+)_PC 35e:4_C43H80NO7P // 3693_([M+H]+)_PC 35p:3_C43H80NO7P	PC	FALSE	FALSE	TRUE
P6139	3444_([M+H]+)_PC 34a:3_C42H78NO8P	PC	FALSE	FALSE	TRUE
P6140	3444_([M+H]+)_PC 34a:3_C42H78NO8P	PC	FALSE	FALSE	TRUE
P6141	3600_([M+H]+)_PC 35e:3_C43H82NO7P // 3692_([M+H]+)_PC 35p:2_C43H82NO7P	PC	TRUE	FALSE	FALSE
P6191	3598_([M+H]+)_PC 35e:1_C43H86NO7P // 3690_([M+H]+)_PC 35p:0_C43H86NO7P	PC	FALSE	FALSE	TRUE
P6221	3441_([M+H]+)_PC 34a:0_C42H84NO8P	PC	FALSE	FALSE	TRUE
P6227	5891_([M+NH4]+)_TG 44:3_C47H84O6	TG	TRUE	TRUE	FALSE
P6276	3610_([M+H]+)_PC 36e:5_C44H80NO7P // 3701_([M+H]+)_PC 36p:4_C44H80NO7P	PC	FALSE	FALSE	TRUE
P6280	330_([M+H-H2O]+)_HexCer (d18:1/C22:0)_C46H89O8N	HexCer	FALSE	TRUE	FALSE
P6283	5880_([M+NH4]+)_TG 44:1_C47H88O6	TG	FALSE	TRUE	FALSE
P6290	3191_([M+NH4]+)_PA 40a:5_C43H74O8P	PA	FALSE	FALSE	TRUE
P6295	5891_([M+Na]+)_TG 44:3_C47H84O6	TG	TRUE	TRUE	FALSE
P6313	3453_([M+H]+)_PC 35a:4_C43H78NO8P	PC	FALSE	TRUE	FALSE
P6326	5879_([M+NH4]+)_TG 44:0_C47H90O6	TG	FALSE	TRUE	FALSE
P6365	3608_([M+H]+)_PC 36e:3_C44H84NO7P // 3699_([M+H]+)_PC 36p:2_C44H84NO7P	PC	FALSE	FALSE	TRUE
P6383	729_([M+H]+)_SM (d18:1/C21:1)_C44H87N2O6P	SM	FALSE	FALSE	TRUE
P6389	3603_([M+Na]+)_PC 35e:6_C43H76NO7P // 3695_([M+Na]+)_PC 35p:5_C43H76NO7P	PC	FALSE	FALSE	TRUE
P6469	3445_([M+Na]+)_PC 34a:4_C42H76NO8P	PC	FALSE	TRUE	FALSE
P6502	3465_([M+H]+)_PC 36a:6_C44H76NO8P	PC	FALSE	TRUE	TRUE
P6563	3463_([M+H]+)_PC 36a:4_C44H80NO8P	PC	FALSE	TRUE	FALSE
P6564	3616_([M+H]+)_PC 37e:4_C45H84NO7P // 3706_([M+H]+)_PC 37p:3_C45H84NO7P	PC	FALSE	TRUE	TRUE
P6582	748_([M+H]+)_SM (d18:2/C22:1)_C45H87N2O6P	SM	FALSE	FALSE	TRUE
P6622	3477_([M+H]+)_PC 37a:8_C45H74NO8P	PC	FALSE	TRUE	TRUE
P6633	3460_([M+H]+)_PC 36a:1_C44H86NO8P	PC	TRUE	FALSE	FALSE
P6636	5930_([M+NH4]+)_TG 46:4_C49H86O6	TG	TRUE	TRUE	FALSE
P6657	3453_([M+Na]+)_PC 35a:4_C43H78NO8P	PC	FALSE	TRUE	FALSE
P6669	5929_([M+NH4]+)_TG 46:3_C49H88O6	TG	FALSE	TRUE	FALSE
P6677	3213_([M+NH4]+)_PA 42a:7_C45H74O8P	PA	FALSE	FALSE	TRUE
P6709	5928_([M+NH4]+)_TG 46:2_C49H90O6	TG	FALSE	TRUE	FALSE
P6723	5930_([M+Na]+)_TG 46:4_C49H86O6	TG	TRUE	TRUE	FALSE
P6753	5918_([M+NH4]+)_TG 46:1_C49H92O6	TG	TRUE	FALSE	FALSE
P6781	3473_([M+H]+)_PC 37a:4_C45H82NO8P	PC	FALSE	TRUE	FALSE
P6803	749_([M+H]+)_SM (d18:2/C23:1)_C46H89N2O6P	SM	FALSE	FALSE	TRUE
P6845	733_([M+H]+)_SM (d18:1/C23:1)_C46H91N2O6P	SM	FALSE	FALSE	TRUE
P6850	3488_([M+H]+)_PC 38a:9_C46H74NO8P	PC	FALSE	TRUE	FALSE
P6886	3622_([M+H]+)_PC 38e:1_C46H92NO7P // 3711_([M+H]+)_PC 38p:0_C46H92NO7P	PC	FALSE	FALSE	TRUE
P6887	361_([M+H]+)_HexCer (d18:0/C22:0(OH))_C46H91O9N	HexCer	FALSE	FALSE	TRUE
P6890	5949_([M+NH4]+)_TG 47:4_C50H88O6	TG	TRUE	FALSE	FALSE
P6902	3205_([M+NH4]+)_PA 42a:1_C45H86O8P	PA	FALSE	TRUE	FALSE
P6917	3463_([M+Na]+)_PC 36a:4_C44H80NO8P	PC	FALSE	TRUE	FALSE
P6932	5948_([M+NH4]+)_TG 47:3_C50H90O6	TG	TRUE	FALSE	FALSE
P6948	748_([M+Na]+)_SM (d18:2/C22:1)_C45H87N2O6P	SM	FALSE	FALSE	TRUE
P6968	3635_([M+H]+)_PC 39e:6_C47H84NO7P // 3723_([M+H]+)_PC 39p:5_C47H84NO7P	PC	FALSE	FALSE	TRUE
P6969	3635_([M+H]+)_PC 39e:6_C47H84NO7P // 3723_([M+H]+)_PC 39p:5_C47H84NO7P	PC	FALSE	TRUE	TRUE
P6989	5949_([M+Na]+)_TG 47:4_C50H88O6	TG	TRUE	TRUE	FALSE
P7001	3634_([M+H]+)_PC 39e:5_C47H86NO7P // 3722_([M+H]+)_PC 39p:4_C47H86NO7P	PC	FALSE	FALSE	TRUE
P7053	750_([M+H]+)_SM (d18:2/C24:1)_C47H91N2O6P	SM	FALSE	FALSE	TRUE
P7096	384_([M+H]+)_HexCer (d18:1/C23:0(OH))_C47H91O9N	HexCer	FALSE	FALSE	TRUE
P7123	3480_([M+H]+)_PC 38a:1_C46H90NO8P	PC	TRUE	FALSE	FALSE
P7150	3473_([M+Na]+)_PC 37a:4_C45H82NO8P	PC	FALSE	TRUE	FALSE
P7177	5969_([M+Na]+)_TG 48:5_C51H88O6	TG	FALSE	TRUE	FALSE
P7195	332_([M+Na]+)_HexCer (d18:1/C23:0)_C47H91O8N	HexCer	FALSE	FALSE	TRUE
P7214	733_([M+Na]+)_SM (d18:1/C23:1)_C46H91N2O6P	SM	FALSE	FALSE	TRUE
P7216	5968_([M+Na]+)_TG 48:4_C51H90O6	TG	FALSE	TRUE	FALSE
P7234	3471_([M+Na]+)_PC 37a:2_C45H86NO8P	PC	TRUE	FALSE	FALSE
P7295	751_([M+H]+)_SM (d18:2/C25:1)_C48H93N2O6P	SM	FALSE	FALSE	TRUE
P7333	737_([M+H]+)_SM (d18:1/C25:1)_C48H95N2O6P	SM	FALSE	FALSE	TRUE
P7344	3511_([M+H]+)_PC 40a:9_C48H78NO8P	PC	FALSE	TRUE	FALSE
P7348	3493_([M+H]+)_PC 39a:2_C47H90NO8P	PC	FALSE	FALSE	TRUE
P7356	5988_([M+NH4]+)_TG 49:5_C52H90O6	TG	TRUE	FALSE	FALSE
P7375	5955_([M+Na]+)_TG 48:0_C51H98O6	TG	FALSE	TRUE	FALSE
P7387	3638_([M+H]+)_PC 40e:1_C48H96NO7P // 3725_([M+H]+)_PC 40p:0_C48H96NO7P	PC	FALSE	FALSE	TRUE
P7391	5987_([M+NH4]+)_TG 49:4_C52H92O6	TG	FALSE	TRUE	FALSE
P7427	5986_([M+NH4]+)_TG 49:3_C52H94O6	TG	FALSE	TRUE	FALSE
P7439	5988_([M+Na]+)_TG 49:5_C52H90O6	TG	FALSE	TRUE	FALSE
P7451	514_([M+H]+)_DiHexCer (d18:1/C14:0)_C44H83NO13	DiHexCer	FALSE	FALSE	TRUE
P7462	5985_([M+NH4]+)_TG 49:2_C52H96O6	TG	FALSE	TRUE	FALSE
P7475	5987_([M+Na]+)_TG 49:4_C52H92O6	TG	FALSE	TRUE	FALSE
P7499	5975_([M+NH4]+)_TG 49:1_C52H98O6	TG	FALSE	TRUE	FALSE
P7500	5975_([M+NH4]+)_TG 49:1_C52H98O6	TG	FALSE	TRUE	FALSE
P7527	362_([M+Na]+)_HexCer (d18:0/C23:0(OH))_C47H93O9N	HexCer	FALSE	FALSE	TRUE
P7530	6009_([M+NH4]+)_TG 50:7_C53H88O6	TG	TRUE	TRUE	FALSE
P7543	752_([M+H]+)_SM (d18:2/C26:1)_C49H95N2O6P	SM	FALSE	FALSE	TRUE
P7544	5985_([M+Na]+)_TG 49:2_C52H96O6	TG	FALSE	TRUE	FALSE
P7561	6008_([M+NH4]+)_TG 50:6_C53H90O6	TG	TRUE	TRUE	FALSE
P7578	739_([M+H]+)_SM (d18:1/C26:1)_C49H97N2O6P	SM	FALSE	FALSE	TRUE
P7592	3504_([M+H]+)_PC 40a:2_C48H92NO8P	PC	TRUE	FALSE	TRUE
P7608	6009_([M+Na]+)_TG 50:7_C53H88O6	TG	TRUE	TRUE	FALSE
P7632	3502_([M+H]+)_PC 40a:1_C48H94NO8P	PC	TRUE	FALSE	TRUE
P7637	6006_([M+NH4]+)_TG 50:4_C53H94O6	TG	FALSE	TRUE	FALSE
P7638	6006_([M+NH4]+)_TG 50:4_C53H94O6	TG	FALSE	TRUE	FALSE
P7647	6008_([M+Na]+)_TG 50:6_C53H90O6	TG	TRUE	TRUE	FALSE
P7698	3653_([M+H]+)_PC 42e:6_C50H90NO7P // 3738_([M+H]+)_PC 42p:5_C50H90NO7P	PC	FALSE	TRUE	FALSE
P7707	6004_([M+NH4]+)_TG 50:2_C53H98O6	TG	FALSE	TRUE	FALSE
P7716	737_([M+Na]+)_SM (d18:1/C25:1)_C48H95N2O6P	SM	FALSE	FALSE	TRUE
P7718	6006_([M+Na]+)_TG 50:4_C53H94O6	TG	FALSE	TRUE	TRUE
P7732	3519_([M+H]+)_PC 41a:5_C49H88NO8P	PC	FALSE	FALSE	TRUE
P7744	5994_([M+NH4]+)_TG 50:1_C53H100O6	TG	FALSE	TRUE	FALSE
P7804	6004_([M+Na]+)_TG 50:2_C53H98O6	TG	FALSE	TRUE	FALSE
P7825	6027_([M+NH4]+)_TG 51:6_C54H92O6	TG	TRUE	TRUE	FALSE
P7855	514_([M+Na]+)_DiHexCer (d18:1/C14:0)_C44H83NO13	DiHexCer	FALSE	FALSE	TRUE
P7864	6026_([M+NH4]+)_TG 51:5_C54H94O6	TG	FALSE	TRUE	FALSE
P7883	5993_([M+Na]+)_TG 50:0_C53H102O6	TG	FALSE	FALSE	TRUE
P7884	5993_([M+Na]+)_TG 50:0_C53H102O6	TG	FALSE	TRUE	FALSE
P7901	6025_([M+NH4]+)_TG 51:4_C54H96O6	TG	FALSE	TRUE	FALSE
P7915	6027_([M+Na]+)_TG 51:6_C54H92O6	TG	FALSE	TRUE	TRUE
P7923	6042_([M+H]+)_TG 52:2_C55H102O6	TG	FALSE	TRUE	FALSE
P7936	6024_([M+NH4]+)_TG 51:3_C54H98O6	TG	FALSE	TRUE	FALSE
P7952	6026_([M+Na]+)_TG 51:5_C54H94O6	TG	FALSE	FALSE	TRUE
P7967	3532_([M+H]+)_PC 42a:6_C50H88NO8P	PC	TRUE	FALSE	FALSE
P7978	6023_([M+NH4]+)_TG 51:2_C54H100O6	TG	FALSE	TRUE	FALSE
P7993	6025_([M+Na]+)_TG 51:4_C54H96O6	TG	FALSE	TRUE	TRUE
P8018	6048_([M+NH4]+)_TG 52:8_C55H90O6	TG	TRUE	TRUE	FALSE
P8025	6013_([M+NH4]+)_TG 51:1_C54H102O6	TG	FALSE	TRUE	FALSE
P8026	6013_([M+NH4]+)_TG 51:1_C54H102O6	TG	FALSE	TRUE	FALSE
P8045	6024_([M+Na]+)_TG 51:3_C54H98O6	TG	FALSE	TRUE	FALSE
P8061	3530_([M+H]+)_PC 42a:4_C50H92NO8P	PC	FALSE	FALSE	TRUE
P8065	6047_([M+NH4]+)_TG 52:7_C55H92O6	TG	FALSE	TRUE	FALSE
P8084	6023_([M+Na]+)_TG 51:2_C54H100O6	TG	FALSE	TRUE	FALSE
P8101	6046_([M+NH4]+)_TG 52:6_C55H94O6	TG	FALSE	TRUE	FALSE
P8108	6048_([M+Na]+)_TG 52:8_C55H90O6	TG	TRUE	TRUE	FALSE
P8124	3528_([M+H]+)_PC 42a:2_C50H96NO8P	PC	FALSE	FALSE	TRUE
P8129	6045_([M+NH4]+)_TG 52:5_C55H96O6	TG	TRUE	FALSE	FALSE
P8130	6045_([M+NH4]+)_TG 52:5_C55H96O6	TG	FALSE	TRUE	FALSE
P8139	6047_([M+Na]+)_TG 52:7_C55H92O6	TG	FALSE	TRUE	FALSE
P8150	6012_([M+Na]+)_TG 51:0_C54H104O6	TG	FALSE	FALSE	TRUE
P8160	3525_([M+H]+)_PC 42a:1_C50H98NO8P	PC	TRUE	FALSE	TRUE
P8191	6043_([M+NH4]+)_TG 52:3_C55H100O6	TG	FALSE	TRUE	FALSE
P8220	6042_([M+NH4]+)_TG 52:2_C55H102O6	TG	FALSE	TRUE	FALSE
P8221	6042_([M+NH4]+)_TG 52:2_C55H102O6	TG	FALSE	TRUE	FALSE
P8231	6044_([M+Na]+)_TG 52:4_C55H98O6	TG	FALSE	FALSE	TRUE
P8254	6032_([M+NH4]+)_TG 52:1_C55H104O6	TG	FALSE	TRUE	FALSE
P8271	6043_([M+Na]+)_TG 52:3_C55H100O6	TG	FALSE	TRUE	FALSE
P8289	6066_([M+NH4]+)_TG 53:7_C56H94O6	TG	FALSE	TRUE	FALSE
P8297	6031_([M+NH4]+)_TG 52:0_C55H106O6	TG	FALSE	FALSE	TRUE
P8301	4547_([M+Na]+)_PI 36a:4_C45H79O13P	PI	TRUE	FALSE	FALSE
P8314	6042_([M+Na]+)_TG 52:2_C55H102O6	TG	FALSE	TRUE	FALSE
P8315	6042_([M+Na]+)_TG 52:2_C55H102O6	TG	TRUE	FALSE	FALSE
P8338	6065_([M+NH4]+)_TG 53:6_C56H96O6	TG	TRUE	TRUE	FALSE
P8356	6082_([M+H]+)_TG 54:4_C57H102O6	TG	TRUE	FALSE	FALSE
P8369	6064_([M+NH4]+)_TG 53:5_C56H98O6	TG	FALSE	TRUE	FALSE
P8391	6031_([M+Na]+)_TG 52:0_C55H106O6	TG	FALSE	FALSE	TRUE
P8392	6031_([M+Na]+)_TG 52:0_C55H106O6	TG	TRUE	FALSE	FALSE
P8407	6063_([M+NH4]+)_TG 53:4_C56H100O6	TG	FALSE	TRUE	FALSE
P8420	6065_([M+Na]+)_TG 53:6_C56H96O6	TG	FALSE	TRUE	FALSE
P8450	6062_([M+NH4]+)_TG 53:3_C56H102O6	TG	FALSE	TRUE	FALSE
P8480	6087_([M+NH4]+)_TG 54:9_C57H92O6	TG	TRUE	TRUE	FALSE
P8487	6061_([M+NH4]+)_TG 53:2_C56H104O6	TG	FALSE	TRUE	FALSE
P8516	3551_([M+H]+)_PC 44a:5_C52H94NO8P	PC	FALSE	FALSE	TRUE
P8541	6062_([M+Na]+)_TG 53:3_C56H102O6	TG	FALSE	TRUE	FALSE
P8551	3550_([M+H]+)_PC 44a:4_C52H96NO8P	PC	FALSE	FALSE	TRUE
P8569	6087_([M+Na]+)_TG 54:9_C57H92O6	TG	FALSE	TRUE	FALSE
P8578	6061_([M+Na]+)_TG 53:2_C56H104O6	TG	FALSE	TRUE	FALSE
P8596	6084_([M+NH4]+)_TG 54:6_C57H98O6	TG	FALSE	TRUE	FALSE
P8601	6086_([M+Na]+)_TG 54:8_C57H94O6	TG	FALSE	TRUE	FALSE
P8616	3548_([M+H]+)_PC 44a:2_C52H100NO8P	PC	FALSE	FALSE	TRUE
P8633	6085_([M+Na]+)_TG 54:7_C57H96O6	TG	TRUE	TRUE	FALSE
P8661	6082_([M+NH4]+)_TG 54:4_C57H102O6	TG	TRUE	FALSE	FALSE
P8693	6081_([M+NH4]+)_TG 54:3_C57H104O6	TG	FALSE	TRUE	FALSE
P8695	6081_([M+NH4]+)_TG 54:3_C57H104O6	TG	TRUE	FALSE	FALSE
P8722	6080_([M+NH4]+)_TG 54:2_C57H106O6	TG	FALSE	TRUE	FALSE
P8723	6080_([M+NH4]+)_TG 54:2_C57H106O6	TG	TRUE	FALSE	FALSE
P8734	6082_([M+Na]+)_TG 54:4_C57H102O6	TG	TRUE	FALSE	FALSE
P8772	6081_([M+Na]+)_TG 54:3_C57H104O6	TG	TRUE	FALSE	FALSE
P8806	6080_([M+Na]+)_TG 54:2_C57H106O6	TG	TRUE	FALSE	FALSE
P881	82_([M+H]+)_Linoleamide_C18H33NO	PFAA	FALSE	FALSE	TRUE
P8845	6102_([M+NH4]+)_TG 55:5_C58H102O6	TG	FALSE	TRUE	FALSE
P8850	6104_([M+Na]+)_TG 55:7_C58H98O6	TG	TRUE	FALSE	TRUE
P8872	6101_([M+NH4]+)_TG 55:4_C58H104O6	TG	TRUE	TRUE	FALSE
P8882	6103_([M+Na]+)_TG 55:6_C58H100O6	TG	FALSE	TRUE	FALSE
P8897	6109_([M+NH4]+)_TG 56:10_C59H94O6	TG	TRUE	TRUE	FALSE
P8902	6100_([M+NH4]+)_TG 55:3_C58H106O6	TG	FALSE	FALSE	TRUE
P8904	6100_([M+NH4]+)_TG 55:3_C58H106O6	TG	FALSE	TRUE	FALSE
P8918	6102_([M+Na]+)_TG 55:5_C58H102O6	TG	FALSE	TRUE	FALSE
P8942	6099_([M+NH4]+)_TG 55:2_C58H108O6	TG	TRUE	FALSE	FALSE
P8957	6101_([M+Na]+)_TG 55:4_C58H104O6	TG	TRUE	TRUE	FALSE
P9016	6125_([M+Na]+)_TG 56:9_C59H96O6	TG	TRUE	FALSE	TRUE
P9024	6099_([M+Na]+)_TG 55:2_C58H108O6	TG	TRUE	TRUE	FALSE
P9061	6089_([M+Na]+)_TG 55:1_C58H110O6	TG	TRUE	FALSE	FALSE
P9084	6123_([M+Na]+)_TG 56:7_C59H100O6	TG	TRUE	FALSE	FALSE
P9110	6120_([M+NH4]+)_TG 56:4_C59H106O6	TG	TRUE	FALSE	FALSE
P9140	6119_([M+NH4]+)_TG 56:3_C59H108O6	TG	TRUE	FALSE	FALSE
P9161	6144_([M+NH4]+)_TG 57:9_C60H98O6	TG	FALSE	FALSE	TRUE
P9169	6118_([M+NH4]+)_TG 56:2_C59H110O6	TG	FALSE	TRUE	FALSE
P9170	6118_([M+NH4]+)_TG 56:2_C59H110O6	TG	TRUE	FALSE	FALSE
P9171	6118_([M+NH4]+)_TG 56:2_C59H110O6	TG	TRUE	FALSE	FALSE
P9180	6120_([M+Na]+)_TG 56:4_C59H106O6	TG	FALSE	TRUE	FALSE
P9191	6143_([M+NH4]+)_TG 57:8_C60H100O6	TG	TRUE	FALSE	FALSE
P9198	6108_([M+NH4]+)_TG 56:1_C59H112O6	TG	TRUE	FALSE	FALSE
P9232	6118_([M+Na]+)_TG 56:2_C59H110O6	TG	TRUE	FALSE	FALSE
P9256	6108_([M+Na]+)_TG 56:1_C59H112O6	TG	TRUE	FALSE	FALSE
P9264	6140_([M+NH4]+)_TG 57:5_C60H106O6	TG	FALSE	TRUE	FALSE
P9271	6142_([M+Na]+)_TG 57:7_C60H102O6	TG	TRUE	FALSE	FALSE
P9285	6139_([M+NH4]+)_TG 57:4_C60H108O6	TG	FALSE	FALSE	TRUE
P9318	6140_([M+Na]+)_TG 57:5_C60H106O6	TG	FALSE	TRUE	FALSE
P9339	6137_([M+NH4]+)_TG 57:2_C60H112O6	TG	TRUE	FALSE	FALSE
P9403	6137_([M+Na]+)_TG 57:2_C60H112O6	TG	TRUE	TRUE	FALSE
P9450	6159_([M+NH4]+)_TG 58:5_C61H108O6	TG	FALSE	TRUE	FALSE
P9469	6167_([M+NH4]+)_TG 59:11_C62H98O6	TG	FALSE	TRUE	TRUE
P9476	6158_([M+NH4]+)_TG 58:4_C61H110O6	TG	FALSE	TRUE	FALSE
P9494	6157_([M+NH4]+)_TG 58:3_C61H112O6	TG	FALSE	TRUE	FALSE
P9495	6157_([M+NH4]+)_TG 58:3_C61H112O6	TG	TRUE	TRUE	FALSE
P9496	6157_([M+NH4]+)_TG 58:3_C61H112O6	TG	TRUE	TRUE	FALSE
P9520	6156_([M+NH4]+)_TG 58:2_C61H114O6	TG	TRUE	FALSE	FALSE
P9521	6156_([M+NH4]+)_TG 58:2_C61H114O6	TG	TRUE	TRUE	FALSE
P9539	6146_([M+NH4]+)_TG 58:1_C61H116O6	TG	TRUE	FALSE	FALSE
P9544	6157_([M+Na]+)_TG 58:3_C61H112O6	TG	TRUE	FALSE	FALSE
P9555	6156_([M+Na]+)_TG 58:2_C61H114O6	TG	TRUE	FALSE	FALSE
P9637	6201_([M+NH4]+)_TG 60:9_C63H104O6	TG	FALSE	FALSE	TRUE
P9678	6199_([M+NH4]+)_TG 60:7_C63H108O6	TG	TRUE	FALSE	FALSE
P9689	6198_([M+NH4]+)_TG 60:6_C63H110O6	TG	TRUE	FALSE	FALSE
P9706	6199_([M+Na]+)_TG 60:7_C63H108O6	TG	TRUE	FALSE	FALSE
P9711	6196_([M+NH4]+)_TG 60:4_C63H114O6	TG	TRUE	FALSE	FALSE
P9724	6195_([M+NH4]+)_TG 60:3_C63H116O6	TG	TRUE	FALSE	FALSE
P9735	6194_([M+NH4]+)_TG 60:2_C63H118O6	TG	TRUE	FALSE	FALSE
P9740	6196_([M+Na]+)_TG 60:4_C63H114O6	TG	TRUE	FALSE	FALSE
P9756	6195_([M+Na]+)_TG 60:3_C63H116O6	TG	TRUE	FALSE	FALSE
P9762	6227_([M+NH4]+)_TG 62:14_C65H98O6	TG	FALSE	FALSE	TRUE
P9774	6194_([M+Na]+)_TG 60:2_C63H118O6	TG	TRUE	FALSE	FALSE
P9780	535_([M+Na]+)_DiHexCer (d18:1/C24:1)_C54H101NO13	DiHexCer	FALSE	FALSE	TRUE
P9796	6225_([M+NH4]+)_TG 62:12_C65H102O6	TG	FALSE	FALSE	TRUE
P9920	6286_([M+NH4]+)_TG 65:16_C68H100O6	TG	FALSE	TRUE	TRUE
