# Supplementary figures and images for: A Multimodal Omics Exploration of the Motor and Non-Motor Symptoms of Parkinson’s Disease
Source: MDPI journal article supplement (doi:10.3390/ijtm2010009), 2022-03-08

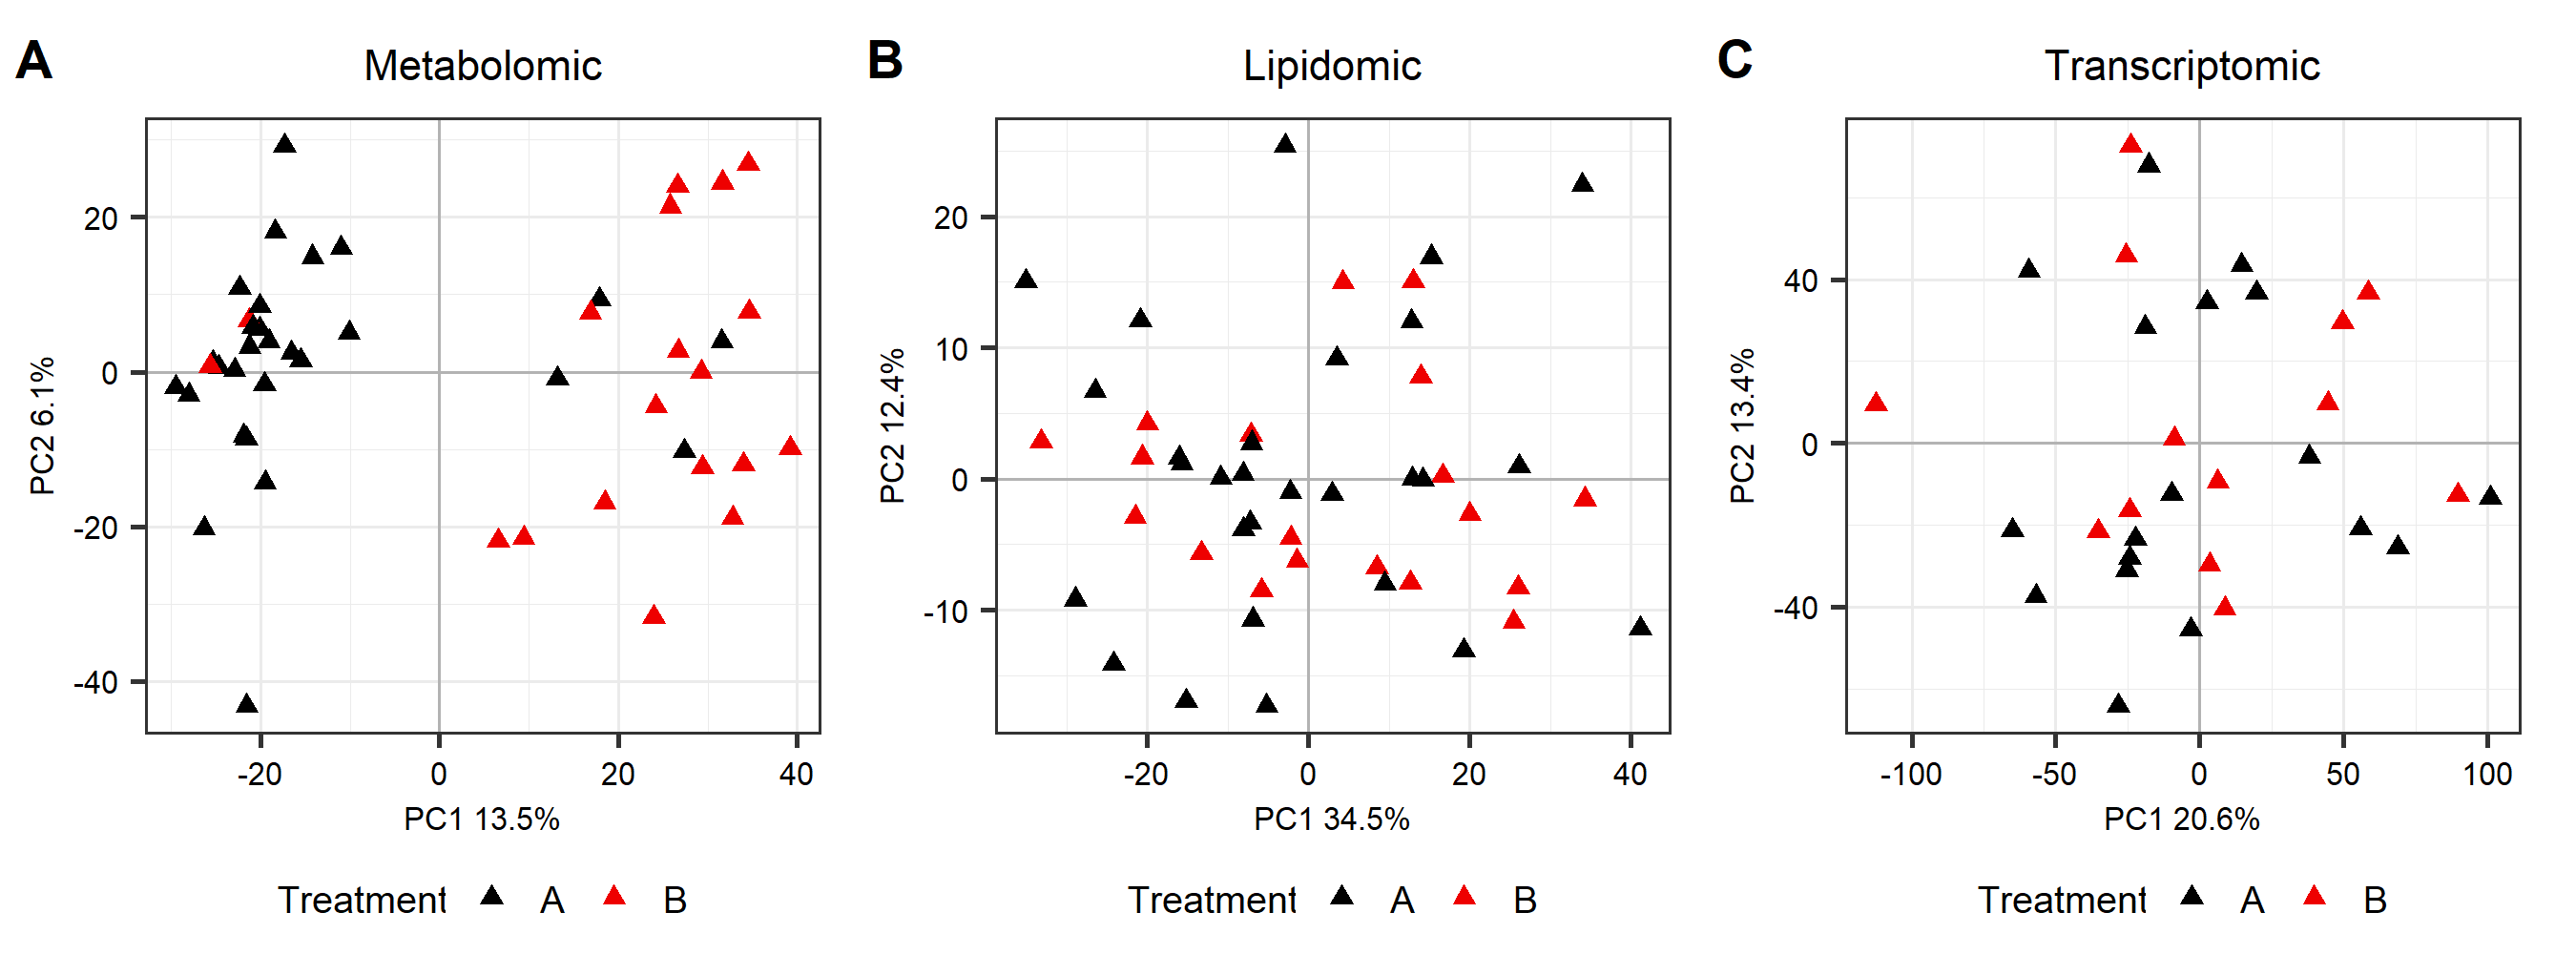

Supplement: s1 [file s1 › Nucleipark_Figure S1_20220221.tiff]

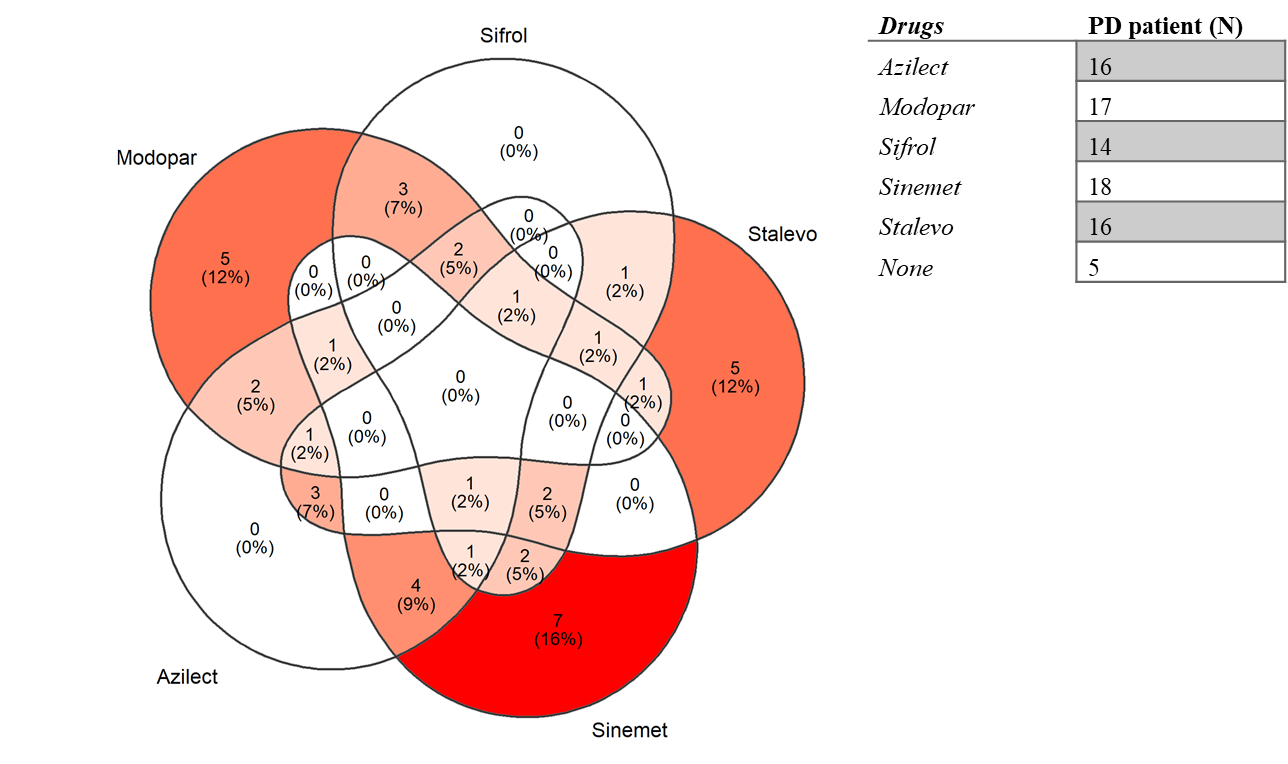

Supplement: s1 [file s1 › Nucleipark_Figure S2_20220221.tif]
